# Supplementary material for: Genome-based microbial ecology of anammox granules in a full-scale wastewater treatment system
Source: PubMed Central journal article supplement (PMC4821891; doi:10.1038/ncomms11172), 2016-03-31
Supplement: ncomms11172-s1.pdf [file ncomms11172-s1.pdf]

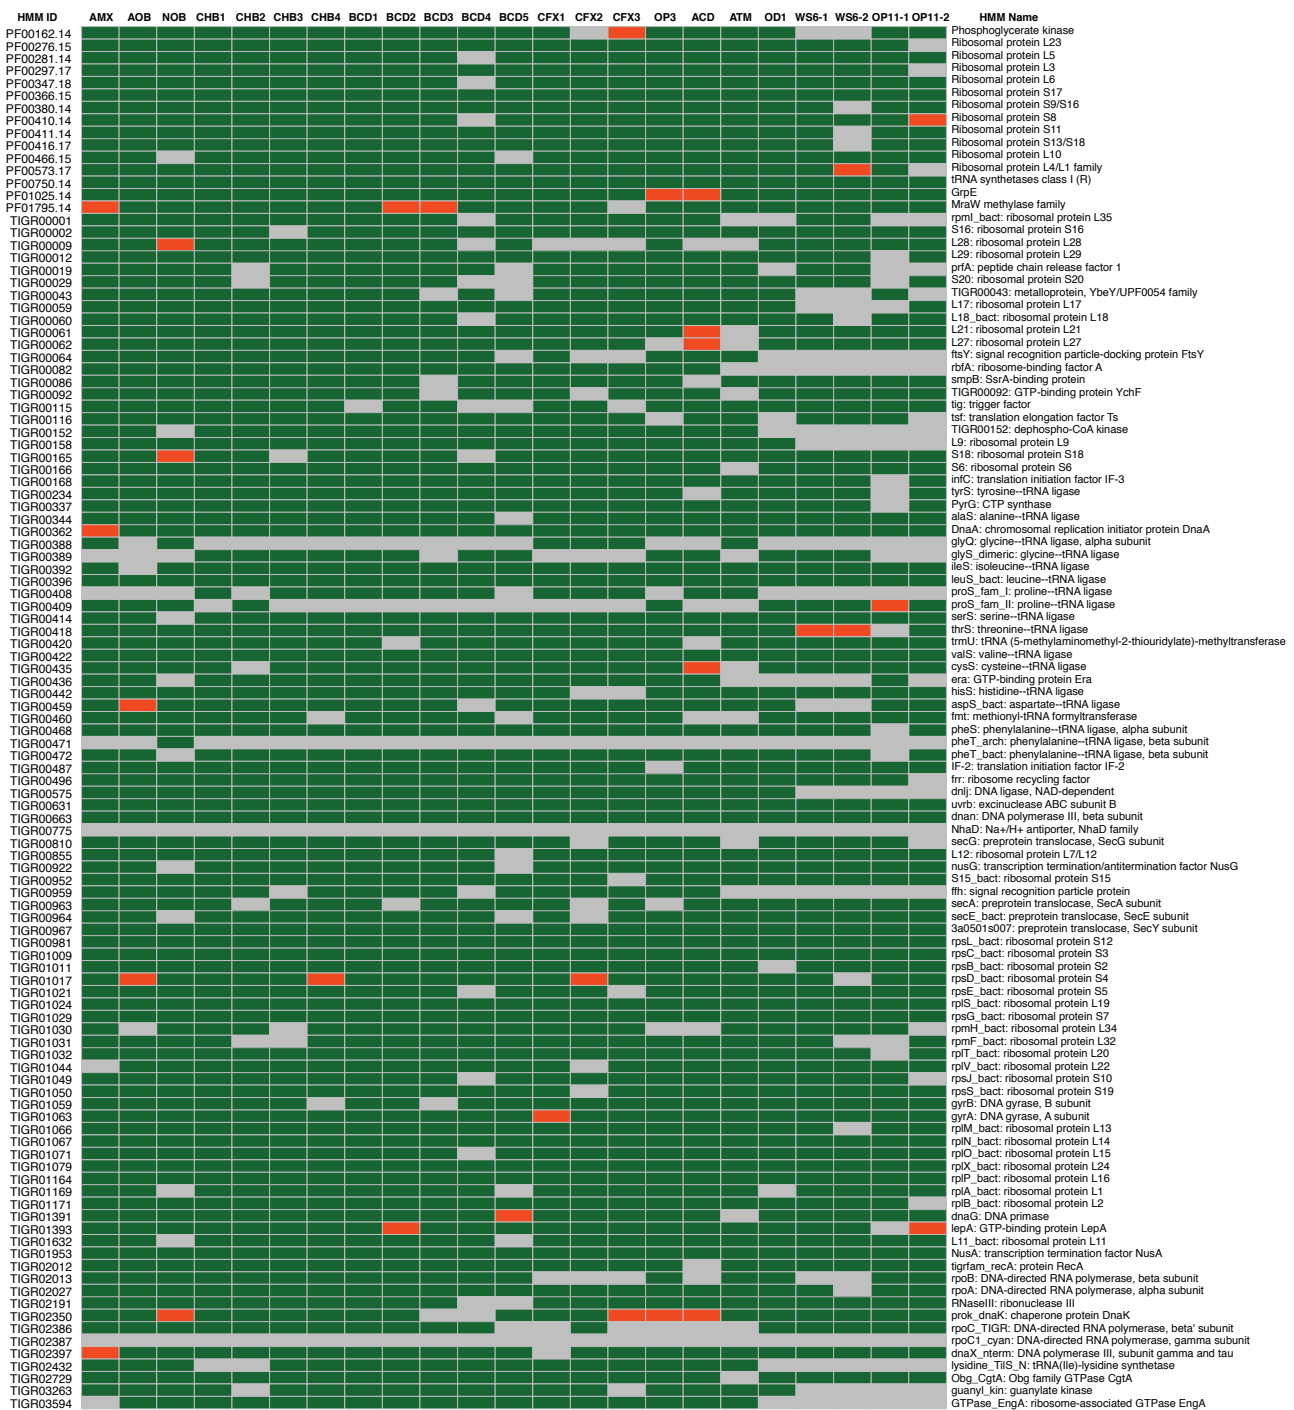

**Supplementary Figure 1** presence/absence of marker genes used to estimate genome completeness.

Grey indicates a marker gene was not detected, green indicates a single copy of the marker was detected and red indicates multiple copies were detected. The set of 111 markers was taken from Dupont et al. (2012), and the HMMs used (essential.hmm) were downloaded from [github.com/MadsAlbertsen/mmgenome/tree/master/scripts](https://github.com/MadsAlbertsen/mmgenome/tree/master/scripts) and searched using CheckM

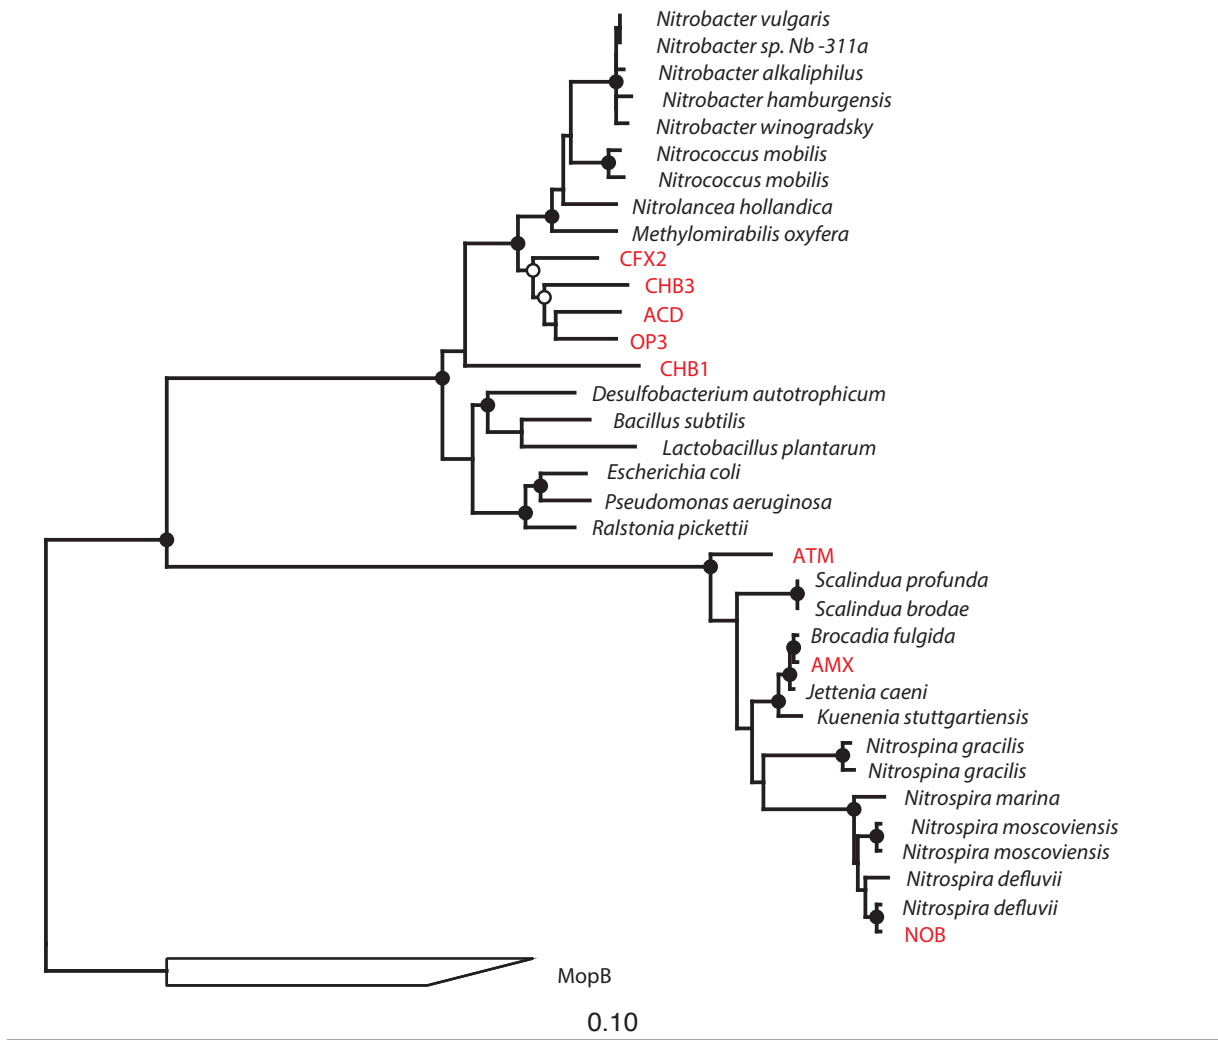

**Supplementary Figure 2** Phylogeny of the large subunit of nitrate reductase (narG) and nitrate oxidoreductase (nxrA) detected in the draft genomes.

Sequences obtained in this study are indicated in red. The gene from ATM clearly clusters with AMX, NOB, and known nxrA genes. Aligned reference sequences were obtained from Lucker et al. (2013). Sequences obtained in this study were imported in ARB, aligned with the reference sequences and alignment was manually inspected and curated. 6 MopB sequences were used as outgroup. Aligned sequences were exported from ARB and a phylogenetic tree was constructed using FastTree and bootstrapped using SeqBoot from the PHYLIP package and the script CompareToBootstrap.pl. The tree was reimported in ARB for visualization.

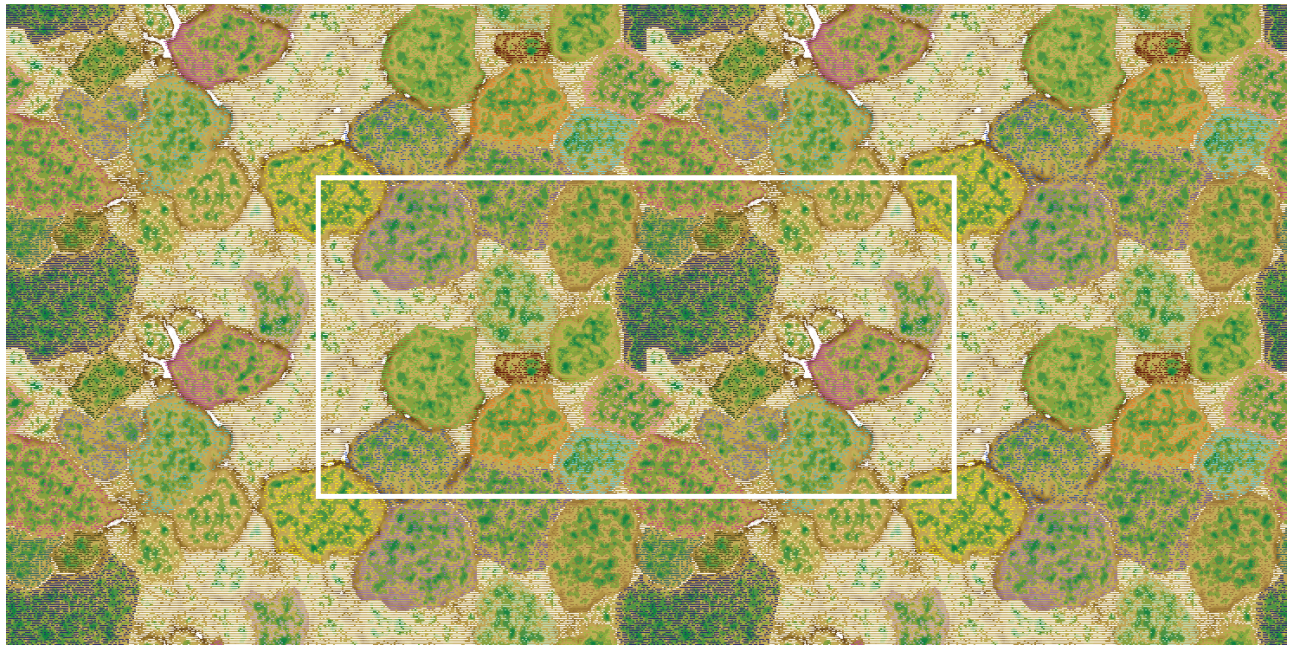

**Supplementary Figure 3** tetraESOM map of all contigs longer than 5000 bp  
Emergent self organizing map based on tetranucleotide frequency of all contigs longer than 5000 bp colored based on identified clusters. The clusters were extracted and used to visually guide the R binning (see methods and supplementary Fig. 4-6). The map is built up of repeating units, indicated by the white box.

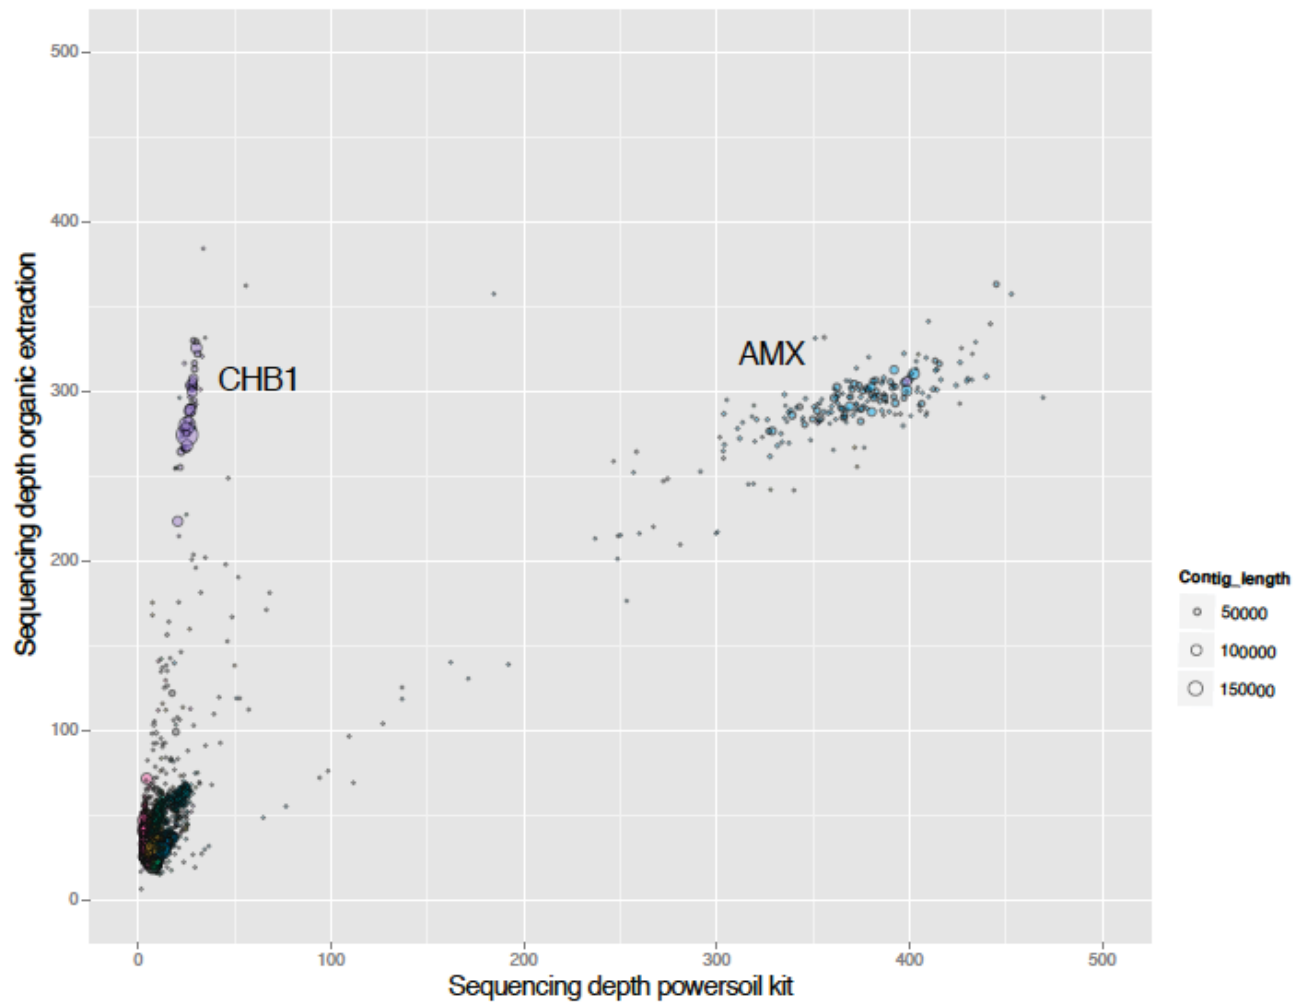

**Supplementary Figure 4** Differential coverage binning using DNA isolation biases

The different effectiveness of either DNA isolation methods on AMX and CHB1 results in differences in sequencing depth which can be exploited to separate them from each other.

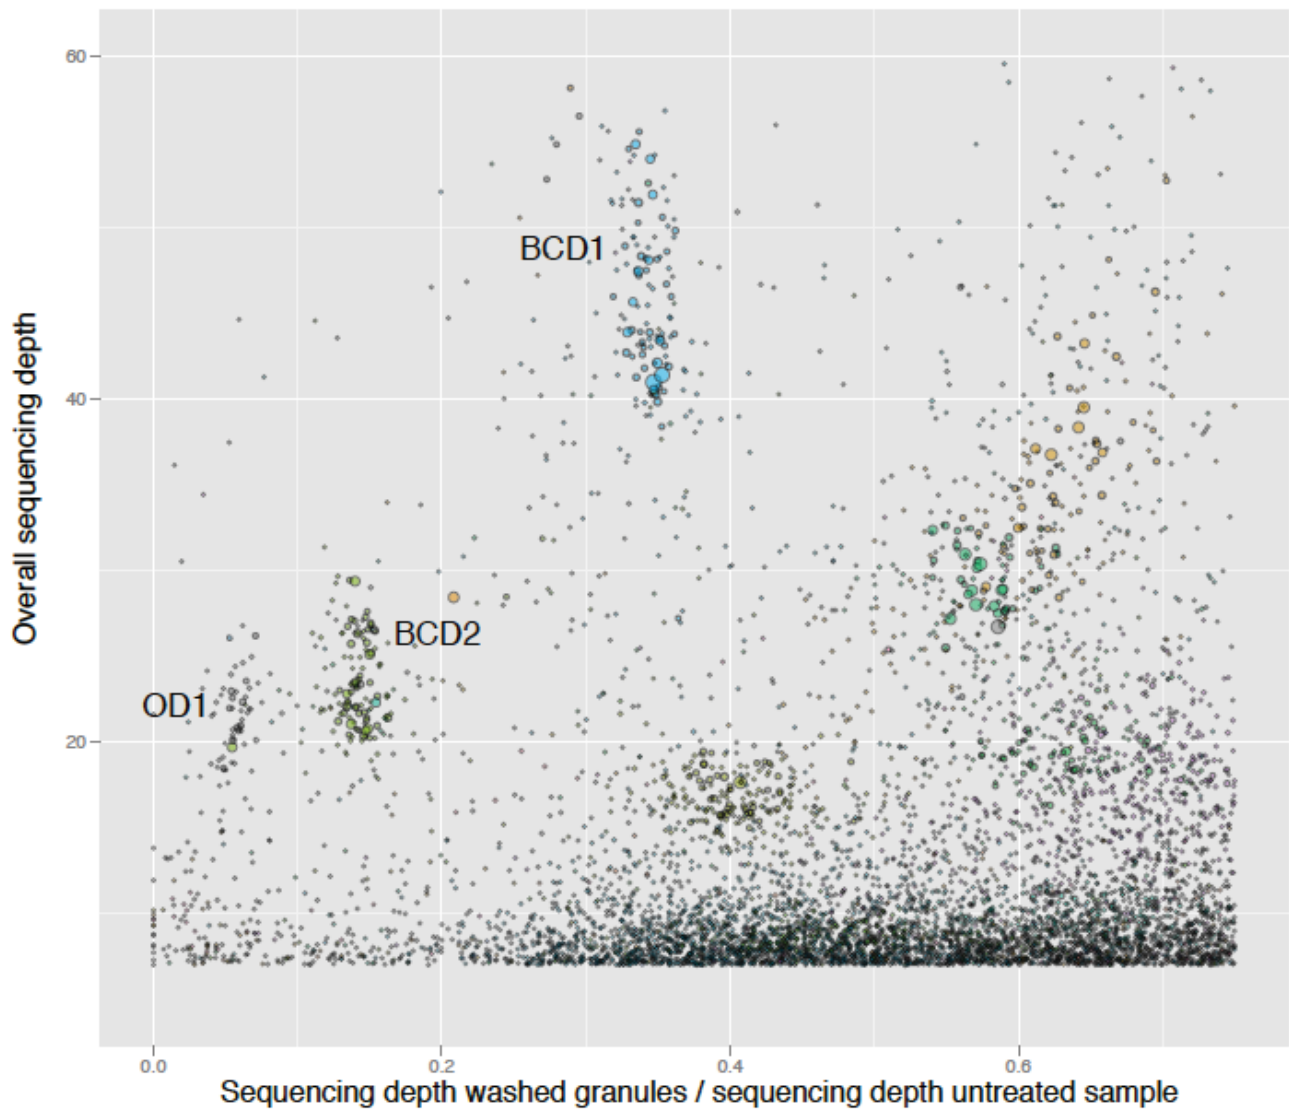

**Supplementary Figure 5** Depletion of BCD1, BCD2 and OD1 in the washed granule fraction  
 Washing the granular biomass results in different depletion of, amongst others, BCD1, BCD2, and OD1 in the washed granules fraction. This can be exploited to separate them from the other contigs

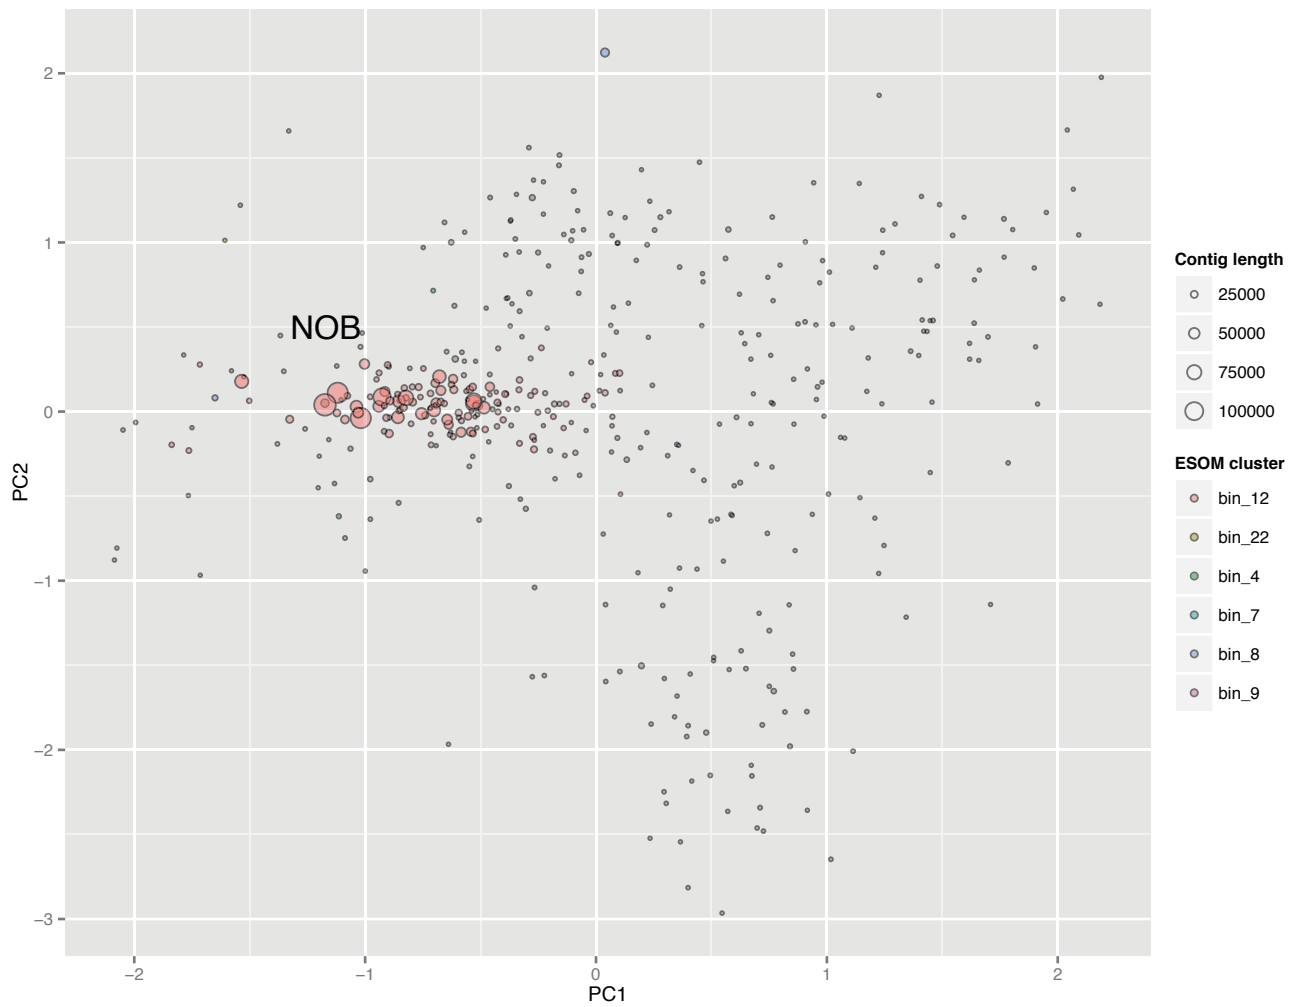

**Supplementary Figure 6** refining of NOB bin

Scatterplot indicating the first two components of a tetranucleotide frequency principle component analysis of the contigs included in a preliminary NOB bin. All bins were checked using a principle component analysis of tetranucleotide frequencies of the contigs to further refine the binning.

**Supplementary Table 1** Sequencing effort for this study

| <b>Sample</b> | <b>Height from base</b> | <b>Treatment</b> | <b>Extraction method</b> | <b>Runs</b> | <b>No. of reads after quality trim</b> | <b>Average read length after quality trim</b> |
|---------------|-------------------------|------------------|--------------------------|-------------|----------------------------------------|-----------------------------------------------|
| 1             | 3.8 m                   | None             | Organic extraction       | 2           | 4,318,303                              | 303 bp                                        |
| 2             | 3.8 m                   | None             | Powersoil Kit            | 1           | 1,956,018                              | 291 bp                                        |
| 3             | 3.8 m                   | Washed granules  | Organic extraction       | 2           | 4,922,405                              | 310 bp                                        |
| 4             | 3.8 m                   | Washed granules  | Powersoil Kit            | 1           | 2,262,638                              | 301 bp                                        |
| 5             | 1.4 m                   | None             | Organic extraction       | 2           | 4,947,305                              | 303 bp                                        |
| 6             | 1.4 m                   | None             | Powersoil Kit            | 1           | 2,400,541                              | 282 bp                                        |
| 7             | 1.4 m                   | Washed granules  | Organic extraction       | 2           | 4,663,465                              | 308 bp                                        |
| 8             | 1.4 m                   | Washed granules  | Powersoil Kit            | 1           | 1,796,121                              | 302 bp                                        |



**Supplementary Table 2** Read mapping of the 8 subsamples on the obtained draft genomes (1/4)

**Organic extraction  
Untreated biomass**

|          | sample point<br>3.8m | sample<br>point 1.4m | average |
|----------|----------------------|----------------------|---------|
| reads    | 4318303              | 4947305              |         |
| mapped   | 2063596              | 2357388              |         |
| % mapped | 47.79                | 47.65                | 47.72   |

| bin    | No. of reads | No. of reads | % of reads | % of reads |
|--------|--------------|--------------|------------|------------|
|        | 3.8m         | 1.4m         | 3.8m       | 1.4m       |
| AMX    | 577108       | 952081       | 13.36      | 19.24      |
| AOB    | 78220        | 198889       | 1.81       | 4.02       |
| NOB    | 124178       | 81959        | 2.88       | 1.66       |
| CHB1   | 483428       | 337529       | 11.19      | 6.82       |
| CHB2   | 97449        | 88862        | 2.26       | 1.80       |
| CHB3   | 25256        | 25738        | 0.58       | 0.52       |
| CHB4   | 55569        | 51933        | 1.29       | 1.05       |
| BCD1   | 125171       | 125004       | 2.90       | 2.53       |
| BCD2   | 75132        | 74383        | 1.74       | 1.50       |
| BCD3   | 50542        | 67923        | 1.17       | 1.37       |
| BCD4   | 38847        | 38321        | 0.90       | 0.77       |
| BCD5   | 18391        | 26762        | 0.43       | 0.54       |
| CFX1   | 84507        | 57130        | 1.96       | 1.15       |
| CFX2   | 34165        | 46017        | 0.79       | 0.93       |
| CFX3   | 57699        | 41513        | 1.34       | 0.84       |
| OP3    | 30353        | 40479        | 0.70       | 0.82       |
| ACD    | 31750        | 28474        | 0.74       | 0.58       |
| ATM    | 22107        | 17580        | 0.51       | 0.36       |
| OD1    | 19415        | 26743        | 0.45       | 0.54       |
| WS6-1  | 13152        | 12057        | 0.30       | 0.24       |
| WS6-2  | 8111         | 8034         | 0.19       | 0.16       |
| OP11-1 | 6912         | 5605         | 0.16       | 0.11       |
| OP11-2 | 6134         | 4372         | 0.14       | 0.09       |
| sums   | 2063596      | 2357388      | 47.79      | 47.65      |



**Supplementary Table 2** Read mapping of the 8 subsamples on the obtained draft genomes (2/4)

**Organic extraction  
Washed granules**

|          | sample point<br>3.8m | sample<br>point 1.4m | average |
|----------|----------------------|----------------------|---------|
| reads    | 4922405              | 4663465              |         |
| mapped   | 2953326              | 2773692              |         |
| % mapped | 60.00                | 59.48                | 59.74   |

| bin    | No. of reads | No. of reads | % of reads | % of reads |
|--------|--------------|--------------|------------|------------|
|        | 3.8m         | 1.4m         | 3.8m       | 1.4m       |
| AMX    | 1197310      | 1003066      | 24.32      | 21.51      |
| AOB    | 111769       | 76573        | 2.27       | 1.64       |
| NOB    | 59882        | 67030        | 1.22       | 1.44       |
| CHB1   | 736383       | 730604       | 14.96      | 15.67      |
| CHB2   | 156930       | 167284       | 3.19       | 3.59       |
| CHB3   | 46557        | 40121        | 0.95       | 0.86       |
| CHB4   | 38020        | 48348        | 0.77       | 1.04       |
| BCD1   | 52017        | 60134        | 1.06       | 1.29       |
| BCD2   | 13547        | 12459        | 0.28       | 0.27       |
| BCD3   | 42082        | 38206        | 0.85       | 0.82       |
| BCD4   | 26957        | 26436        | 0.55       | 0.57       |
| BCD5   | 23820        | 23209        | 0.48       | 0.50       |
| CFX1   | 167717       | 192902       | 3.41       | 4.14       |
| CFX2   | 17627        | 18093        | 0.36       | 0.39       |
| CFX3   | 51411        | 73941        | 1.04       | 1.59       |
| OP3    | 59581        | 52711        | 1.21       | 1.13       |
| ACD    | 53132        | 52735        | 1.08       | 1.13       |
| ATM    | 34564        | 32712        | 0.70       | 0.70       |
| OD1    | 1625         | 794          | 0.03       | 0.02       |
| WS6-1  | 25795        | 23273        | 0.52       | 0.50       |
| WS6-2  | 15829        | 13242        | 0.32       | 0.28       |
| OP11-1 | 11259        | 10361        | 0.23       | 0.22       |
| OP11-2 | 9512         | 9458         | 0.19       | 0.20       |
| sums   | 2953326      | 2773692      | 60.00      | 59.48      |

**Supplementary Table 2** Read mapping of the 8 subsamples on the obtained draft genomes (3/4)

**Powersoil kit**  
**Untreated biomass**

|                 | sample point sample |            |         |
|-----------------|---------------------|------------|---------|
|                 | 3.8m                | point 1.4m | average |
| <b>reads</b>    | 1956018             | 2400541    |         |
| <b>mapped</b>   | 1280603             | 1719985    |         |
| <b>% mapped</b> | 65.47               | 71.65      | 68.56   |

| bin    | No. of reads | No. of     | % of reads | % of reads |
|--------|--------------|------------|------------|------------|
|        | 3.8m         | reads 1.4m | 3.8m       | 1.4m       |
| AMX    | 885622       | 1228827    | 45.28      | 51.19      |
| AOB    | 39256        | 53253      | 2.01       | 2.22       |
| NOB    | 20052        | 21668      | 1.03       | 0.90       |
| CHB1   | 67651        | 104561     | 3.46       | 4.36       |
| CHB2   | 23831        | 38280      | 1.22       | 1.59       |
| CHB3   | 7112         | 9554       | 0.36       | 0.40       |
| CHB4   | 12996        | 13364      | 0.66       | 0.56       |
| BCD1   | 67870        | 80762      | 3.47       | 3.36       |
| BCD2   | 31001        | 36274      | 1.58       | 1.51       |
| BCD3   | 29776        | 33686      | 1.52       | 1.40       |
| BCD4   | 6426         | 8366       | 0.33       | 0.35       |
| BCD5   | 13796        | 15638      | 0.71       | 0.65       |
| CFX1   | 13789        | 10259      | 0.70       | 0.43       |
| CFX2   | 24323        | 18825      | 1.24       | 0.78       |
| CFX3   | 8619         | 11660      | 0.44       | 0.49       |
| OP3    | 5513         | 7434       | 0.28       | 0.31       |
| ACD    | 5627         | 7517       | 0.29       | 0.31       |
| ATM    | 3604         | 3556       | 0.18       | 0.15       |
| OD1    | 7966         | 7719       | 0.41       | 0.32       |
| WS6-1  | 2268         | 3416       | 0.12       | 0.14       |
| WS6-2  | 1209         | 1884       | 0.06       | 0.08       |
| OP11-1 | 1187         | 1825       | 0.06       | 0.08       |
| OP11-2 | 1109         | 1657       | 0.06       | 0.07       |
| sums   | 1280603      | 1719985    | 65.47      | 71.65      |

**Supplementary Table 2** Read mapping of the 8 subsamples on the obtained draft genomes (4/4)

**Powersoil kit**  
**Washed granules**

|          | sample<br>point 3.8m | sample<br>point 1.4m | average |
|----------|----------------------|----------------------|---------|
| reads    | 2262638              | 1796121              |         |
| mapped   | 1804268              | 1372542              |         |
| % mapped | 79.74                | 76.42                | 78.08   |

| bin    | No. of<br>reads 3.8m | No. of<br>reads 1.4m | % of reads<br>3.8m | % of reads<br>1.4m |
|--------|----------------------|----------------------|--------------------|--------------------|
| AMX    | 1615796              | 1173620              | 71.41              | 65.34              |
| AOB    | 38788                | 42436                | 1.71               | 2.36               |
| NOB    | 12452                | 17749                | 0.55               | 0.99               |
| CHB1   | 26740                | 23137                | 1.18               | 1.29               |
| CHB2   | 22547                | 19590                | 1.00               | 1.09               |
| CHB3   | 7136                 | 9189                 | 0.32               | 0.51               |
| CHB4   | 2503                 | 5275                 | 0.11               | 0.29               |
| BCD1   | 11647                | 8849                 | 0.51               | 0.49               |
| BCD2   | 3007                 | 1210                 | 0.13               | 0.07               |
| BCD3   | 13190                | 8806                 | 0.58               | 0.49               |
| BCD4   | 2630                 | 1494                 | 0.12               | 0.08               |
| BCD5   | 9306                 | 10693                | 0.41               | 0.60               |
| CFX1   | 5097                 | 10609                | 0.23               | 0.59               |
| CFX2   | 6896                 | 5697                 | 0.30               | 0.32               |
| CFX3   | 7883                 | 12773                | 0.35               | 0.71               |
| OP3    | 6595                 | 9371                 | 0.29               | 0.52               |
| ACD    | 2969                 | 3901                 | 0.13               | 0.22               |
| ATM    | 1718                 | 2144                 | 0.08               | 0.12               |
| OD1    | 890                  | 197                  | 0.04               | 0.01               |
| WS6-1  | 2416                 | 2782                 | 0.11               | 0.15               |
| WS6-2  | 1396                 | 879                  | 0.06               | 0.05               |
| OP11-1 | 1234                 | 787                  | 0.05               | 0.04               |
| OP11-2 | 1432                 | 1354                 | 0.06               | 0.08               |
| sums   | 1804268              | 1372542              | 79.74              | 76.42              |

**Supplementary Table 3** Previous detection and closest relatives of the dominant organisms (1/2)

| <b>Bin</b> | <b>No. of blast hits &gt;97% identity against NCBI-nt</b> | <b>blast hits &gt;97% identity against organisms in anammox systems</b> |
|------------|-----------------------------------------------------------|-------------------------------------------------------------------------|
| AMX        | 37                                                        | 37                                                                      |
| AOB        | 233                                                       | 49                                                                      |
| NOB        | 86                                                        | 5                                                                       |
| CHB1       | 3                                                         | 2                                                                       |
| CHB2       | 39                                                        | 3                                                                       |
| CHB3       | 10                                                        | 8                                                                       |
| CHB4       | 10                                                        | 0                                                                       |
| BCD1       | 32                                                        | 0                                                                       |
| BCD2       | 14                                                        | 2                                                                       |
| BCD3       | 3                                                         | 0                                                                       |
| BCD4       | 4                                                         | 0                                                                       |
| BCD5       | 20                                                        | 4                                                                       |
| CFX1       | 5                                                         | 4                                                                       |
| CFX2       | 35                                                        | 12                                                                      |
| CFX3       | 2                                                         | 0                                                                       |
| OP3        | 18                                                        | 18                                                                      |
| ACD        | 34                                                        | 9                                                                       |
| ATM        | 15                                                        | 14                                                                      |
| OD1        | 0                                                         | 0                                                                       |
| WS6-1      | 0                                                         | 0                                                                       |
| WS6-2      | 0                                                         | 0                                                                       |
| OP11-1     | 0                                                         | 0                                                                       |
| OP11-2     | 0                                                         | 0                                                                       |

**Supplementary Table 3** Previous detection and closest relatives of the dominant organisms (2/2)

| Bin    | Closest cultured organism              | 16S rRNA gene identity (%) | Closest sequenced organism         | 16S rRNA gene identity (%) |
|--------|----------------------------------------|----------------------------|------------------------------------|----------------------------|
| AMX    | <i>Brocadia sinica</i>                 | 99                         | <i>Brocadia fulgida</i>            | 94                         |
| AOB    | <i>Nitrosomonas europaea</i>           | 99                         | <i>Nitrosomonas europaea</i>       | 99                         |
| NOB    | <i>Nitrospira defluvii</i>             | 97                         | <i>Nitrospira defluvii</i>         | 97                         |
| CHB1   | <i>Ignavibacterium album</i>           | 85                         | <i>Ignavibacterium album</i>       | 85                         |
| CHB2   | <i>Ignavibacterium album</i>           | 86                         | <i>Ignavibacterium album</i>       | 86                         |
| CHB3   | <i>Melioribacter roseus</i>            | 83                         | <i>Melioribacter roseus</i>        | 83                         |
| CHB4   | <i>Prosthecochloris aestuarii</i>      | 84                         | <i>Prosthecochloris aestuarii</i>  | 84                         |
| BCD1   | <i>Haliscomenobacter hydrossis</i>     | 88                         | <i>Haliscomenobacter hydrossis</i> | 88                         |
| BCD2   | <i>Owenweeksia hongkongensis</i>       | 86                         | <i>Owenweeksia hongkongensis</i>   | 86                         |
| BCD3   | <i>Solitalea candensis</i>             | 87                         | <i>Solitalea candensis</i>         | 87                         |
| BCD4   | <i>Solitalea candensis</i>             | 88                         | <i>Solitalea candensis</i>         | 88                         |
| BCD5   | <i>Chryseolinea serpens</i>            | 91                         | <i>Marivirga tractuosa</i>         | 85                         |
| CFX1   | <i>Anaerolinea thermophila</i>         | 82                         | <i>Anaerolinea thermophila</i>     | 82                         |
| CFX2   | <i>Litorilinea aerophila</i>           | 85                         | <i>Caldilinea aerophila</i>        | 84                         |
| CFX3   | <i>Anaerolinea thermophila</i>         | 83                         | <i>Anaerolinea thermophila</i>     | 83                         |
| OP3    | <i>Thermolithobacter ferrireducens</i> | 81                         | <i>Desulfotalea psychrophila</i>   | 81                         |
| ACD    | <i>Aridibacter famidurans</i>          | 93                         | <i>Terriglobus roseus</i>          | 83                         |
| ATM    | <i>Fimbriimonas gingensoli</i>         | 90                         | <i>Fimbriimonas gingensoli</i>     | 90                         |
|        |                                        |                            | <i>Parcubacteria bacterium</i>     |                            |
| OD1    | *                                      |                            | LCCS01000018                       | 82                         |
| WS6-1  | *                                      |                            | WS6 bacterium LBWK01000001         | 80                         |
| WS6-2  | *                                      |                            | WS6 bacterium LBWK01000001         | 81                         |
|        |                                        |                            | <i>Roizmanbacteria bacterium</i>   |                            |
| OP11-1 | *                                      |                            | LBPX0100022                        | 81                         |
| OP11-2 | *                                      |                            | *                                  |                            |

\* = no organisms at over 80% identity

**Supplementary Table 4.** Trusted nitrogen cycle genes

| <b>Accession number</b> | <b>gene</b> | <b>protein</b>                                                 |
|-------------------------|-------------|----------------------------------------------------------------|
| YP_003798852.1          | <i>nxrB</i> | nitrate oxidoreductase subunit beta                            |
| YP_003798853.1          | <i>nxrA</i> | nitrate oxidoreductase subunit alpha                           |
| NP_415742.1             | <i>narG</i> | nitrate reductase, alpha subunit                               |
| NP_415743.1             | <i>narH</i> | nitrate reductase, beta (Fe-S) subunit                         |
| NP_415744.1             | <i>narJ</i> | delta subunit of nitrate reductase                             |
| NP_415745.1             | <i>narI</i> | nitrate reductase, gamma (cytochrome b(NR)) subunit            |
| NP_416707.4             | <i>napB</i> | nitrate reductase, small, cytochrome C550 subunit, periplasmic |
| NP_416710.1             | <i>napA</i> | nitrate reductase, periplasmic, large subunit                  |
| NP_418494.1             | <i>nrfA</i> | nitrite reductase, formate-dependent, cytochrome               |
| NP_249210.1             | <i>nirS</i> | nitrite reductase                                              |
| YP_003799842.1          | <i>nirK</i> | copper-containing nitrite reductase                            |
| NP_249214.1             | <i>norC</i> | nitric-oxide reductase (NorBC) subunit C                       |
| NP_249215.1             | <i>norB</i> | nitric-oxide reductase (NorBC) subunit B                       |
| WP_011617789.1          | <i>norZ</i> | nitric oxide reductase qNor type                               |
| NP_252082.1             | <i>nosZ</i> | nitrous-oxide reductase                                        |
| NP_252083.1             | <i>nosD</i> | NosD protein                                                   |
| NP_252085.1             | <i>nosY</i> | NosY protein                                                   |
| NP_252086.1             | <i>nosL</i> | NosL protein                                                   |
| CAJ73611.1              | <i>hzsC</i> | hydrazine synthase subunit C                                   |
| CAJ73612.1              | <i>hzsB</i> | hydrazine synthase subunit B                                   |
| CAJ73613.1              | <i>hzsA</i> | hydrazine synthase subunit A                                   |
| NP_842054.1             | <i>hao</i>  | hydroxylamine oxidoreductase                                   |
| NP_841016.1             | <i>amoB</i> | ammonia monooxygenase subunit B                                |
| NP_841017.1             | <i>amoA</i> | ammonia monooxygenase subunit A                                |
| NP_841018.1             | <i>amoC</i> | ammonia monooxygenase subunit C                                |
| WP_011160148.1          | <i>nifN</i> | nitrogenase molybdenum-cofactor biosynthesis protein NifN      |
| WP_011160149.1          | <i>nifE</i> | nitrogenase iron-molybdenum cofactor biosynthesis protein NifE |
| WP_011160150.1          | <i>nifK</i> | nitrogenase molybdenum-iron protein beta chain                 |
| WP_011160151.1          | <i>nifD</i> | nitrogenase molybdenum-iron protein alpha chain                |
| WP_011160152.1          | <i>nifH</i> | nitrogenase reductase                                          |
| WP_011160162.1          | <i>nifB</i> | FeMo cofactor biosynthesis protein NifB                        |

**Supplementary Table 5** reference genomes used for annotation of the obtained draft genomes

| Reference dataset      | used for annotation of       | Accession numbers        | Reference dataset               | used for annotation of               | Accession numbers |     |           |
|------------------------|------------------------------|--------------------------|---------------------------------|--------------------------------------|-------------------|-----|-----------|
| <i>Acidobacteria</i>   | ACD                          | NC_012483                | <i>Nitrosomonas</i>             | AOB                                  | NC_015222         |     |           |
|                        |                              | NC_015060                |                                 |                                      | NC_004757         |     |           |
|                        |                              | NC_015064                |                                 |                                      | NC_008344         |     |           |
|                        |                              |                          |                                 | NC_015065                            |                   |     | NC_015731 |
|                        |                              |                          |                                 | NC_015057                            |                   |     |           |
|                        |                              |                          |                                 | NC_015058                            | <i>Nitrospira</i> | NOB | NC_018649 |
|                        |                              |                          |                                 | NC_015059                            |                   |     | NC_017094 |
|                        |                              |                          |                                 | NC_016025                            |                   |     | NC_014355 |
|                        |                              |                          |                                 | NC_016024                            |                   |     | NC_011296 |
|                        |                              |                          |                                 | NC_008009                            |                   |     |           |
|                        |                              | NC_008536                | <i>Sphingo-<br/>bacteriales</i> | BCD1<br>BCD2<br>BCD3<br>BCD4<br>BCD5 | NC_013132         |     |           |
|                        |                              | NC_016631                |                                 |                                      | NC_015510         |     |           |
|                        |                              | NC_018014                |                                 |                                      | NZ_CM001403       |     |           |
|                        |                              | NC_014963                |                                 |                                      | NC_016609         |     |           |
|                        |                              |                          |                                 |                                      | CP007035          |     |           |
|                        |                              |                          |                                 |                                      | NC_013061         |     |           |
|                        |                              |                          |                                 |                                      | NC_015177         |     |           |
|                        |                              |                          |                                 |                                      | NC_015277         |     |           |
|                        |                              |                          |                                 |                                      | NC_017770         |     |           |
|                        |                              |                          |                                 |                                      | NC_016940         |     |           |
| <i>Armatimonadetes</i> | ATM                          | NC_021487<br>NZ_CP007139 |                                 |                                      |                   |     |           |
| <i>Brocadiales</i>     | AMX                          | BAFH01000003             |                                 |                                      |                   |     |           |
|                        |                              | BAFH01000002             |                                 |                                      |                   |     |           |
|                        |                              | BAFH01000001             |                                 |                                      |                   |     |           |
|                        |                              | BAFH01000004             |                                 |                                      |                   |     |           |
|                        |                              | CT573071                 |                                 |                                      |                   |     |           |
|                        |                              | CT573072                 |                                 |                                      |                   |     |           |
|                        |                              | CT573073                 |                                 |                                      |                   |     |           |
|                        |                              | CT573074                 |                                 |                                      |                   |     |           |
|                        |                              | CT030148                 |                                 |                                      |                   |     |           |
|                        |                              |                          |                                 |                                      |                   |     |           |
| <i>Chloroflexi</i>     | CFX1<br>CFX2<br>CFX3         | NC_014960                |                                 |                                      |                   |     |           |
|                        |                              | NC_012032                |                                 |                                      |                   |     |           |
|                        |                              | NC_017079                |                                 |                                      |                   |     |           |
|                        |                              | NC_011831                |                                 |                                      |                   |     |           |
|                        |                              | NC_010175                |                                 |                                      |                   |     |           |
|                        |                              | NC_002936                |                                 |                                      |                   |     |           |
|                        |                              | NC_014314                |                                 |                                      |                   |     |           |
|                        |                              | NC_009972                |                                 |                                      |                   |     |           |
|                        |                              | NC_009767                |                                 |                                      |                   |     |           |
|                        |                              | NC_009523                |                                 |                                      |                   |     |           |
|                        |                              | CP001823                 |                                 |                                      |                   |     |           |
|                        |                              | CP001824                 |                                 |                                      |                   |     |           |
|                        |                              | NC_011959                |                                 |                                      |                   |     |           |
|                        |                              |                          |                                 |                                      |                   |     |           |
| <i>Ignavibacterium</i> | CHB1<br>CHB2<br>CHB3<br>CHB4 | NC_017464                |                                 |                                      |                   |     |           |
|                        |                              | NC_018178                |                                 |                                      |                   |     |           |
|                        |                              |                          |                                 |                                      |                   |     |           |
|                        |                              |                          |                                 |                                      |                   |     |           |



**Supplementary table 6** read mapping and sequencing depth used for niche assignment

| <b>Bin</b> | <b>Mapped reads (untreated)</b> | <b>Mapped reads (washed)</b> | <b>Mean sequencing depth (untreated)</b> | <b>Mean sequencing depth (washed)</b> | <b>Mann Whitney U p-value</b> | <b>t test p-value</b> |
|------------|---------------------------------|------------------------------|------------------------------------------|---------------------------------------|-------------------------------|-----------------------|
| AMX        | 1549472                         | 1781354                      | 120.6225                                 | 140.9845                              | < 0.00001                     | < 0.00001             |
| AOB        | 286007                          | 154917                       | 33.96467                                 | 18.72646                              | < 0.00001                     | < 0.00001             |
| NOB        | 195810                          | 101074                       | 15.974812                                | 8.491949                              | < 0.00001                     | < 0.00001             |
| CHB1       | 825567                          | 1174417                      | 101.4781                                 | 145.0593                              | < 0.00001                     | < 0.00001             |
| CHB2       | 182358                          | 252663                       | 16.76585                                 | 23.38332                              | < 0.00001                     | < 0.00001             |
| CHB3       | 51544                           | 70377                        | 6.370658                                 | 8.793155                              | < 0.00001                     | < 0.00001             |
| CHB4       | 107791                          | 69414                        | 8.450233                                 | 5.663588                              | < 0.00001                     | < 0.00001             |
| BCD1       | 252671                          | 90629                        | 21.672629                                | 7.893073                              | < 0.00001                     | < 0.00001             |
| BCD2       | 151308                          | 21184                        | 14.63932                                 | 2.42754                               | < 0.00001                     | < 0.00001             |
| BCD3       | 118941                          | 64251                        | 12.317571                                | 6.683316                              | < 0.00001                     | < 0.00001             |
| BCD4       | 78461                           | 43285                        | 10.560444                                | 5.884025                              | < 0.00001                     | < 0.00001             |
| BCD5       | 45171                           | 37601                        | 3.985882                                 | 3.435843                              | < 0.00001                     | < 0.00001             |
| CFX1       | 143597                          | 293034                       | 10.49001                                 | 21.62427                              | < 0.00001                     | < 0.00001             |
| CFX2       | 79611                           | 28688                        | 8.012961                                 | 3.106448                              | < 0.00001                     | < 0.00001             |
| CFX3       | 98165                           | 99037                        | 8.089152                                 | 8.28197                               | < 0.00001                     | < 0.00001             |
| OP3        | 70576                           | 89689                        | 5.404915                                 | 6.990687                              | < 0.00001                     | < 0.00001             |
| ACD        | 60438                           | 84756                        | 6.372306                                 | 8.988227                              | < 0.00001                     | < 0.00001             |
| ATM        | 39430                           | 53493                        | 4.86051                                  | 6.608888                              | < 0.00001                     | < 0.00001             |
| OD1        | 46442                           | 1919                         | 15.43859                                 | 1.43055                               | < 0.00001                     | < 0.00001             |
| WS6-1      | 25099                           | 39054                        | 5.450347                                 | 8.524052                              | < 0.00001                     | < 0.00001             |
| WS6-2      | 16062                           | 23051                        | 4.806135                                 | 6.828341                              | < 0.00001                     | < 0.00001             |
| OP11-1     | 12513                           | 17374                        | 4.134759                                 | 5.708186                              | < 0.00001                     | < 0.00001             |
| OP11-2     | 10444                           | 14976                        | 3.704933                                 | 5.122653                              | < 0.00001                     | < 0.00001             |

## Supplementary Note 1

### all commands run during the manual binning process of the Olburgen PNA dataset

### for an editable version, contact Daan Speth

### the file these commands were run on can be downloaded from:

### [https://figshare.com/articles/Olburgen\\_PNA\\_genome\\_binning\\_source\\_data/1612256](https://figshare.com/articles/Olburgen_PNA_genome_binning_source_data/1612256)

```
> A_source_data <- read.delim(Source_data_all)
```

```
> require(vegan)
```

```
Loading required package: vegan
```

```
Loading required package: permute
```

```
Loading required package: lattice
```

```
This is vegan 2.0-9
```

```
> require(ggplot2)
```

```
Loading required package: ggplot2
```

```
> plot <- ggplot(A_source_data, aes(x=GC_content, y=Sequencing_depth, fill=bin, size=Contig_length)) +  
geom_point(alpha=0.5, shape=21)
```

```
> plot
```

```
> plot + ylim(0,1000)
```

```
Warning message:
```

```
Removed 15 rows containing missing values (geom_point).
```

```
> plot <- ggplot(A_source_data, aes(x=Average_coverage_total, y=Average_coverage_gran, fill=bin,  
size=Contig_length)) + geom_point(alpha=0.5, shape=21)
```

```
> plot
```

```
> plot + xlim(0,1000) + ylim(0,1000)
```

```
Warning message:
```

```
Removed 6 rows containing missing values (geom_point).
```

```
> plot <- ggplot(A_source_data, aes(x=Average_coverage_kit, y=Average_coverage_ctab, fill=bin,  
size=Contig_length)) + geom_point(alpha=0.5, shape=21)
```

```
> plot
```

```
> plot + xlim(0,1000) + ylim(0,1000)
```

```
Warning message:
```

```
Removed 6 rows containing missing values (geom_point).
```

```
> plot <- ggplot(A_source_data, aes(x=isolation_bias, y=Sequencing_depth, fill=bin, size=Contig_length)) +  
geom_point(alpha=0.5, shape=21)
```

```
> plot
```

```
> plot +ylim(0,1000)
```

```
Warning message:
```

```
Removed 15 rows containing missing values (geom_point).
```

```
> plot +ylim(0,250)
```

```
Warning message:
```

```
Removed 275 rows containing missing values (geom_point).
```

```
> plot +ylim(0,50)
```

```
Warning message:
```

```
Removed 1102 rows containing missing values (geom_point).
```

```
> plot +ylim(0,10) + xlim(0,3)
```

```
Warning message:
```

```
Removed 10362 rows containing missing values (geom_point).
```

```
> plot +ylim(0,1000) +xlim(0,3)
```

```
Warning message:
```

```
Removed 56 rows containing missing values (geom_point).
```

```

> a_bin1 <- subset(A_source_data, Sequencing_depth > 250 & isolation_bias > 0.9)
> plot <- ggplot(a_bin1, aes(x=GC_content, y=Sequencing_depth, fill=bin, size=Contig_length)) +
geom_point(alpha=0.5, shape=21)
> plot
> plot <- ggplot(a_bin1, aes(x=isolation_bias, y=gran_ratio, fill=bin, size=Contig_length)) + geom_point(alpha=0.5,
shape=21)
> plot
> rda <- rda(a_bin1[,13:268], data=a_bin1[,1:12], scale=T)
> scores <- scores(rda, choices = 1:5)$sites
> X_scores <- scores(rda, choices = 1:5)$sites
> rm(scores)
> a_bin1_all <- cbind(a_bin1, X_scores)
> pairs(a_bin1_all[,269:273], upper.panel=NULL)
> temp <- rbind(A_source_data, a_bin1)
> plot <- ggplot(a_bin1_all, aes(x=GC_content, y=PC2, fill=bin, size=Contig_length)) + geom_point(alpha=0.5,
shape=21)
> plot
> plot <- ggplot(a_bin1_all, aes(x=PC1, y=PC2, fill=bin, size=Contig_length)) + geom_point(alpha=0.5, shape=21)
> plot
> temp <- A_source_data[!(A_source_data$Contig %in% a_bin1$Contig),]
> plot <- ggplot(temp, aes(x=GC_content, y=Sequencing_depth, fill=bin, size=Contig_length)) +
geom_point(alpha=0.5, shape=21)
> plot
> plot <- ggplot(temp, aes(x=Average_coverage_gran, y=Average_coverage_total, fill=bin, size=Contig_length)) +
geom_point(alpha=0.5, shape=21)
> plot
> plot <- ggplot(temp, aes(x=gran_ratio, y=Sequencing_depth, fill=bin, size=Contig_length)) + geom_point(alpha=0.5,
shape=21)
> plot
> plot +xlim(0,2)
Warning message:
Removed 8948 rows containing missing values (geom_point).
> plot +xlim(1,2) + ylim(0,500)
Warning message:
Removed 63127 rows containing missing values (geom_point).
> b_bin2 <- subset(temp, gran_ratio < 2 & gran_ratio > 1.25 & Sequencing_depth > 100)
> plot <- ggplot(b_bin2, aes(x=gran_ratio, y=isolation_bias, fill=bin, size=Contig_length)) + geom_point(alpha=0.5,
shape=21)
> plot
> b_bin2 <- subset(b_bin2, isolation_bias < 0.5)
> plot <- ggplot(b_bin2, aes(x=GC_content, y=Sequencing_depth, fill=bin, size=Contig_length)) +
geom_point(alpha=0.5, shape=21)
> plot
> rda <- rda(b_bin2[,13:268], data=b_bin2[,1:12], scale=T)
> X_scores <- scores(rda, choices = 1:5)$sites
> b_bin2_all <- cbind(b_bin2, X_scores)
> pairs(b_bin2_all[,269:273], upper.panel=NULL)
> plot <- ggplot(b_bin2_all, aes(x=PC1, y=Sequencing_depth, fill=bin, size=Contig_length)) + geom_point(alpha=0.5,
shape=21)
> plot
> plot <- ggplot(b_bin2_all, aes(x=PC1, y=PC2, fill=bin, size=Contig_length)) + geom_point(alpha=0.5, shape=21)
> plot
> b_bin2_all <- subset(b_bin2_all, PC1 > -2 & PC2 > -2)
> plot <- ggplot(b_bin2_all, aes(x=GC_content, y=Sequencing_depth, fill=bin, size=Contig_length)) +

```

```

geom_point(alpha=0.5, shape=21)
> plot
> plot <- ggplot(b_bin2_all, aes(x=PC1, y=PC2, fill=bin, size=Contig_length)) + geom_point(alpha=0.5, shape=21)
> plot
> plot <- ggplot(b_bin2_all, aes(x=gran_ratio, y=isolation_bias, fill=bin, size=Contig_length)) +
geom_point(alpha=0.5, shape=21)
> plot
> b_bin2_all_t <- subset(b_bin2_all, gran_ratio > 1.4 & gran_ratio < 1.65 & isolation_bias < 0.112)
> plot <- ggplot(b_bin2_all_t, aes(x=PC1, y=PC2, fill=bin, size=Contig_length)) + geom_point(alpha=0.5, shape=21)
> plot
> rm(b_bin2_all_t)
> plot <- ggplot(b_bin2_all, aes(x=gran_ratio, y=isolation_bias, fill=bin, size=Contig_length)) +
geom_point(alpha=0.5, shape=21)
> plot
> b_bin2_all <- subset(b_bin2_all, isolation_bias < 0.112)
> temp_t <- temp[!(temp$Contig %in% b_bin2_all$Contig),]
> temp <- temp[!(temp$Contig %in% b_bin2_all$Contig),]
> rm(temp_t)
> plot <- ggplot(temp, aes(x=GC_content, y=Sequencing_depth, fill=bin, size=Contig_length)) +
geom_point(alpha=0.5, shape=21)
> plot
> plot + ylim(0,200)
Warning message:
Removed 22 rows containing missing values (geom_point).
> plot <- ggplot(temp, aes(x=Average_coverage_gran, y=Average_coverage_total, fill=bin, size=Contig_length)) +
geom_point(alpha=0.5, shape=21)
> plot
> plot + xlim(0,100) + ylim(0,100)
Warning message:
Removed 49 rows containing missing values (geom_point).
> plot <- ggplot(temp, aes(x=gran-ratio, y=Sequencing_depth, fill=bin, size=Contig_length)) + geom_point(alpha=0.5,
shape=21)
> plot <- ggplot(temp, aes(x=gran_ratio, y=Sequencing_depth, fill=bin, size=Contig_length)) + geom_point(alpha=0.5,
shape=21)
> plot
> plot + xlim(0,5)
Warning message:
Removed 822 rows containing missing values (geom_point).
> plot + xlim(0,1.5)
Warning message:
Removed 19609 rows containing missing values (geom_point).
> plot + xlim(0,1.5) + ylim(0,200)
Warning message:
Removed 19624 rows containing missing values (geom_point).
> c_bin3 <- subset(temp, gran_ratio > 0.45 & gran_ratio < 1.2 & Sequencing_depth > 40)
> plot <- ggplot(temp, aes(x=gran_ratio, y=isolation_bias, fill=bin, size=Contig_length)) + geom_point(alpha=0.5,
shape=21)
> plot
> plot <- ggplot(c_bin3, aes(x=gran_ratio, y=isolation_bias, fill=bin, size=Contig_length)) + geom_point(alpha=0.5,
shape=21)
> plot
> rda <- rda(c_bin3[,13:268], data=c_bin3[,1:12], scale=T)
> X_scores <- scores(rda, choices = 1:5)$sites
> c_bin3_all <- cbind(c_bin3, X_scores)

```

```

> pairs(c_bin3_all[269:273], upper.panel=NULL)
> plot <- ggplot(c_bin3_all, aes(x=PC1, y=PC2, fill=bin, size=Contig_length)) + geom_point(alpha=0.5, shape=21)
> plot
> plot <- ggplot(c_bin3_all, aes(x=GC_content, y=Sequencing_depth, fill=bin, size=Contig_length)) +
geom_point(alpha=0.5, shape=21)
> plot
> c_bin3_all <- subset(c_bin3_all, PC1 > -1 & PC2 < 1)
> plot <- ggplot(c_bin3_all, aes(x=GC_content, y=Sequencing_depth, fill=bin, size=Contig_length)) +
geom_point(alpha=0.5, shape=21)
> plot
> plot <- ggplot(c_bin3_all, aes(x=isolation_bias, y=gran_ratio, fill=bin, size=Contig_length)) +
geom_point(alpha=0.5, shape=21)
> plot
> c_bin3_all <- subset(c_bin3_all, isolation_bias < 0.8 & gran_ratio < 1.0)
> plot <- ggplot(c_bin3_all, aes(x=isolation_bias, y=gran_ratio, fill=bin, size=Contig_length)) +
geom_point(alpha=0.5, shape=21)
> plot
> c_bin3 <- c_bin3_all[-c(269:273)]
> View(c_bin3)
> View(c_bin3_all)
> rda <- rda(c_bin3[13:268], data=c_bin3[1:12], scale=T)
> X_scores <- scores(rda, choices = 1:5)$sites
> c_bin3_all <- cbind(c_bin3, X_scores)
> pairs(c_bin3_all[269:273], upper.panel=NULL)
> plot <- ggplot(c_bin3_all, aes(x=PC1, y=PC2, fill=bin, size=Contig_length)) + geom_point(alpha=0.5, shape=21)
> plot
> c_bin3_all <- subset(c_bin3_all, PC2 < 2)
> c_bin3_all <- subset(c_bin3_all, PC1 < 2)
> plot <- ggplot(c_bin3_all, aes(x=isolation_bias, y=Sequencing_depth, fill=bin, size=Contig_length)) +
geom_point(alpha=0.5, shape=21)
> plot
> plot + ylim(0,100)
Warning message:
Removed 6 rows containing missing values (geom_point).
> c_bin3_all <- subset(c_bin3_all, isolation_bias < 0.5)
> plot <- ggplot(c_bin3_all, aes(x=PC1, y=PC2, fill=bin, size=Contig_length)) + geom_point(alpha=0.5, shape=21)
> plot
> plot <- ggplot(c_bin3_all, aes(x=isolation_bias, y=gran_ratio, fill=bin, size=Contig_length)) +
geom_point(alpha=0.5, shape=21)
> plot
> temp <- temp[!(temp$Contig %in% c_bin3_all$Contig), ]
> plot <- ggplot(temp, aes(x=gran_ratio, y=Sequencing_depth, fill=bin, size=Contig_length)) + geom_point(alpha=0.5,
shape=21)
> plot
> plot + xlim(0,10)
Warning message:
Removed 152 rows containing missing values (geom_point).
> plot + xlim(0,3)
Warning message:
Removed 2920 rows containing missing values (geom_point).
> plot + xlim(1,2) + ylim(0,200)
Warning message:
Removed 62827 rows containing missing values (geom_point).
> plot + xlim(1,2) + ylim(0,100)

```

Warning message:

Removed 62843 rows containing missing values (geom\_point).

```
> d_bin4 <- subset(temp, gran_ratio > 1 & gran_ratio < 2 & Sequencing_depth > 25)
> plot <- ggplot(temp, aes(x=gran_ratio, y=isolation_bias, fill=bin, size=Contig_length)) + geom_point(alpha=0.5, shape=21)
> plot
> plot <- ggplot(d_bin4, aes(x=gran_ratio, y=isolation_bias, fill=bin, size=Contig_length)) + geom_point(alpha=0.5, shape=21)
> plot
> d_bin4 <- subset(d_bin4, isolation_bias < 0.4 & gran_ratio < 1.75)
> plot <- ggplot(d_bin4, aes(x=gran_ratio, y=isolation_bias, fill=bin, size=Contig_length)) + geom_point(alpha=0.5, shape=21)
> plot
> d_bin4 <- subset(d_bin4, gran_ratio > 1.3)
> rda <- rda(d_bin4[,13:268], data=d_bin4[,1:12], scale=T)
> X_scores <- scores(rda, choices = 1:5)$sites
> d_bin4_all <- cbind(d_bin4, X_scores)
> pairs(d_bin4_all[269:273], upper.panel=NULL)
> plot <- ggplot(d_bin4_all, aes(x=PC1, y=PC3, fill=bin, size=Contig_length)) + geom_point(alpha=0.5, shape=21)
> plot
> plot + xlim(0,1)
```

Warning message:

Removed 438 rows containing missing values (geom\_point).

```
> plot + xlim(-1,1)
```

Warning message:

Removed 74 rows containing missing values (geom\_point).

```
> d_bin4_all <- subset(d_bin4_all, PC1 < 0.25)
> plot <- ggplot(d_bin4_all, aes(x=gran_ratio, y=isolation_bias, fill=bin, size=Contig_length)) +
geom_point(alpha=0.5, shape=21)
> plot
> plot <- ggplot(d_bin4_all, aes(x=GC_content, y=Sequencing_depth, fill=bin, size=Contig_length)) +
geom_point(alpha=0.5, shape=21)
> plot
> temp <- temp[!(temp$Contig %in% d_bin4_all$Contig), ]
> plot <- ggplot(temp, aes(x=GC_content, y=Sequencing_depth, fill=bin, size=Contig_length)) +
geom_point(alpha=0.5, shape=21)
> plot
> plot + ylim(0,100)
```

Warning message:

Removed 60 rows containing missing values (geom\_point).

```
> plot <- ggplot(temp, aes(x=gran_ratio, y=Sequencing_depth, fill=bin, size=Contig_length)) + geom_point(alpha=0.5, shape=21)
> plot
> plot <- ggplot(temp, aes(x=isolation_bias, y=Sequencing_depth, fill=bin, size=Contig_length)) +
geom_point(alpha=0.5, shape=21)
> plot
> plot <- ggplot(temp, aes(x=(1/isolation_bias), y=Sequencing_depth, fill=bin, size=Contig_length)) +
geom_point(alpha=0.5, shape=21)
> plot
> plot + xlim(0,20)
```

Warning message:

Removed 4746 rows containing missing values (geom\_point).

```
> plot + xlim(0,20) + ylim(0,100)
```

Warning message:

```

Removed 4805 rows containing missing values (geom_point).
> plot <- ggplot(temp, aes(x=isolation_bias, y=Sequencing_depth, fill=bin, size=Contig_length)) +
geom_point(alpha=0.5, shape=21)
> plot + ylim(0,100)
Warning message:
Removed 60 rows containing missing values (geom_point).
> plot + ylim(0,100) + xlim(0,1)
Warning message:
Removed 1781 rows containing missing values (geom_point).
> plot + ylim(0,100) + xlim(0.25,1)
Warning message:
Removed 62012 rows containing missing values (geom_point).
> e_bin5 <- subset(temp, isolation_bias > 0.25 & Sequencing_depth > 25)
> plot <- ggplot(e_bin5, aes(x=isolation_bias, y=gran_ratio, fill=bin, size=Contig_length)) + geom_point(alpha=0.5,
shape=21)
> plot
> e_bin5 <- subset(e_bin5, gran_ratio < 0.5 & gran_ratio > 0.2)
> plot <- ggplot(e_bin5, aes(x=isolation_bias, y=gran_ratio, fill=bin, size=Contig_length)) + geom_point(alpha=0.5,
shape=21)
> plot
> rda <- rda(e_bin5[,13:268], data=e_bin5[,1:12], scale=T)
> X_scores <- scores(rda, choices = 1:5)$sites
> e_bin5_all <- cbind(e_bin5, X_scores)
> pairs(e_bin5_all[,269:273], upper.panel=NULL)
> plot <- ggplot(e_bin5_all, aes(x=PC1, y=PC2, fill=bin, size=Contig_length)) + geom_point(alpha=0.5, shape=21)
> plot
> plot + ylim(-1,1)
Warning message:
Removed 54 rows containing missing values (geom_point).
> e_bin5_all <- subset(e_bin5_all, PC2 > -0.2)
> plot <- ggplot(e_bin5_all, aes(x=PC1, y=PC2, fill=bin, size=Contig_length)) + geom_point(alpha=0.5, shape=21)
> plot
> plot <- ggplot(e_bin5_all, aes(x=isolation_bias, y=gran_ratio, fill=bin, size=Contig_length)) +
geom_point(alpha=0.5, shape=21)
> plot
> plot <- ggplot(e_bin5_all, aes(x=GC_content, y=Sequencing_depth, fill=bin, size=Contig_length)) +
geom_point(alpha=0.5, shape=21)
> plot
> temp <- temp[!(temp$Contig %in% e_bin5_all$Contig), ]
> plot <- ggplot(temp, aes(x=GC_content, y=Sequencing_depth, fill=bin, size=Contig_length)) +
geom_point(alpha=0.5, shape=21)
> plot
> plot + ylim(0,100)
Warning message:
Removed 54 rows containing missing values (geom_point).
> plot <- ggplot(temp, aes(x=isolation_bias, y=Sequencing_depth, fill=bin, size=Contig_length)) +
geom_point(alpha=0.5, shape=21)
> plot
> plot <- ggplot(temp, aes(x=gran_ratio, y=Sequencing_depth, fill=bin, size=Contig_length)) + geom_point(alpha=0.5,
shape=21)
> plot
> plot + xlim(0,5)
Warning message:
Removed 822 rows containing missing values (geom_point).

```



```

> plot + xlim(0,5) +ylim(0,100)
Warning message:
Removed 876 rows containing missing values (geom_point).
> plot + xlim(1,4) +ylim(0,100)
Warning message:
Removed 55135 rows containing missing values (geom_point).
> plot + xlim(1,3) +ylim(0,100)
Warning message:
Removed 56653 rows containing missing values (geom_point).
> f_bin6 <- subset(temp, gran_ratio > 1.7 & Sequencing_depth > 10)
> plot <- ggplot(f_bin6, aes(x=gran_ratio, y=isolation_bias, fill=bin, size=Contig_length)) + geom_point(alpha=0.5,
shape=21)
> plot
> plot <- ggplot(f_bin6, aes(x=gran_ratio, y=(1/isolation_bias), fill=bin, size=Contig_length)) +
geom_point(alpha=0.5, shape=21)
> plot
> plot +ylim(0,20)
Warning message:
Removed 47 rows containing missing values (geom_point).
> plot <- ggplot(f_bin6, aes(x=gran_ratio, y=isolation_bias, fill=bin, size=Contig_length)) + geom_point(alpha=0.5,
shape=21)
> plot +ylim(0,0.5)
Warning message:
Removed 18 rows containing missing values (geom_point).
> plot +ylim(0,0.5) + xlim(0,4)
Warning message:
Removed 23 rows containing missing values (geom_point).
> plot <- ggplot(f_bin6, aes(x=isolation_bias, y=Sequencing_depth, fill=bin, size=Contig_length)) +
geom_point(alpha=0.5, shape=21)
> plot
> plot + ylim(0,100)
Warning message:
Removed 19 rows containing missing values (geom_point).
> rda <- rda(f_bin6[,13:268], data=f_bin6[,1:12], scale=T)
> X_scores <- scores(rda, choices = 1:5)$sites
> f_bin6_all <- cbind(f_bin6, X_scores)
> pairs(f_bin6_all[,269:273], upper.panel=NULL)
> plot <- ggplot(f_bin6_all, aes(x=PC1, y=PC2, fill=bin, size=Contig_length)) + geom_point(alpha=0.5, shape=21)
> plot
> plot <- ggplot(f_bin6_all, aes(x=PC1, y=Sequencing_depth, fill=bin, size=Contig_length)) + geom_point(alpha=0.5,
shape=21)
> plot
> f_bin6_all <- subset(f_bin6_all, PC1 < 0)
> plot <- ggplot(f_bin6_all, aes(x=PC1, y=PC2, fill=bin, size=Contig_length)) + geom_point(alpha=0.5, shape=21)
> plot
> f_bin6_all <- subset(f_bin6_all, PC2 > -1)
> plot <- ggplot(f_bin6_all, aes(x=gran_ratio, y=isolation_bias, fill=bin, size=Contig_length)) +
geom_point(alpha=0.5, shape=21)
> plot
> plot <- ggplot(f_bin6_all, aes(x=PC2, y=isolation_bias, fill=bin, size=Contig_length)) + geom_point(alpha=0.5,
shape=21)
> plot
> f_bin6 <- f_bin6_all[-c(269:273)]
> rda <- rda(f_bin6[,13:268], data=f_bin6[,1:12], scale=T)

```

```

> X_scores <- scores(rda, choices = 1:5)$sites
> f_bin6_all <- cbind(f_bin6, X_scores)
> pairs(f_bin6_all[,269:273], upper.panel=NULL)
> plot <- ggplot(f_bin6_all, aes(x=PC1, y=PC2, fill=bin, size=Contig_length)) + geom_point(alpha=0.5, shape=21)
> plot
> plot <- ggplot(f_bin6_all, aes(x=PC1, y=isolation_bias, fill=bin, size=Contig_length)) + geom_point(alpha=0.5,
shape=21)
> plot
> plot <- ggplot(f_bin6_all, aes(x=PC1, y=Sequencing_depth, fill=bin, size=Contig_length)) + geom_point(alpha=0.5,
shape=21)
> plot
> plot + ylim(0,100)
Warning message:
Removed 6 rows containing missing values (geom_point).
> f_bin6_all <- subset(f_bin6_all, PC2 > -0.5 & PC1 < 1)
> plot <- ggplot(f_bin6_all, aes(x=PC2, y=PC3, fill=bin, size=Contig_length)) + geom_point(alpha=0.5, shape=21)
> plot
> f_bin6_all <- subset(f_bin6_all, PC2 < 1.5)
> f_bin6 <- f_bin6_all[-c(269:273)]
> rda <- rda(f_bin6[,13:268], data=f_bin6[,1:12], scale=T)
> X_scores <- scores(rda, choices = 1:5)$sites
> f_bin6_all <- cbind(f_bin6, X_scores)
> pairs(f_bin6_all[,269:273], upper.panel=NULL)
> plot <- ggplot(f_bin6_all, aes(x=PC2, y=PC3, fill=bin, size=Contig_length)) + geom_point(alpha=0.5, shape=21)
> plot
> f_bin6_all <- subset(f_bin6_all, PC2 > -1.5)
> plot <- ggplot(f_bin6_all, aes(x=PC1, y=PC2, fill=bin, size=Contig_length)) + geom_point(alpha=0.5, shape=21)
> plot
> f_bin6_all <- subset(f_bin6_all, PC2 < 1 & PC1 < 1)
> plot <- ggplot(f_bin6_all, aes(x=gran_ratio, y=isolation_bias, fill=bin, size=Contig_length)) +
geom_point(alpha=0.5, shape=21)
> plot
> plot <- ggplot(f_bin6_all, aes(x=PC2, y=isolation_bias, fill=bin, size=Contig_length)) + geom_point(alpha=0.5,
shape=21)
> plot
> plot <- ggplot(f_bin6_all, aes(x=GC_content, y=Sequencing_depth, fill=bin, size=Contig_length)) +
geom_point(alpha=0.5, shape=21)
> plot
> f_bin6_all <- subset(f_bin6_all, Sequencing_depth > 20 | GC_content > 0.64)
> plot <- ggplot(f_bin6_all, aes(x=GC_content, y=Sequencing_depth, fill=bin, size=Contig_length)) +
geom_point(alpha=0.5, shape=21)
> plot
> f_bin6 <- f_bin6_all[-c(269:273)]
> rda <- rda(f_bin6[,13:268], data=f_bin6[,1:12], scale=T)
> X_scores <- scores(rda, choices = 1:5)$sites
> f_bin6_all <- cbind(f_bin6, X_scores)
> pairs(f_bin6_all[,269:273], upper.panel=NULL)
> plot <- ggplot(f_bin6_all, aes(x=PC1, y=PC2, fill=bin, size=Contig_length)) + geom_point(alpha=0.5, shape=21)
> plot
> plot <- ggplot(f_bin6_all, aes(x=isolation_bias, y=gran_ratio, fill=bin, size=Contig_length)) +
geom_point(alpha=0.5, shape=21)
> plot
> plot <- ggplot(f_bin6_all, aes(x=GC_content, y=Sequencing_depth, fill=bin, size=Contig_length)) +
geom_point(alpha=0.5, shape=21)

```

```

> plot
> temp <- temp[!(temp$Contig %in% f_bin6_all$Contig), ]
> plot <- ggplot(temp, aes(x=gran_ratio, y=Sequencing_depth, fill=bin, size=Contig_length)) + geom_point(alpha=0.5,
shape=21)
> plot
> plot + xlim(0,5)
Warning message:
Removed 822 rows containing missing values (geom_point).
> plot + xlim(0,5) + ylim(0,100)
Warning message:
Removed 876 rows containing missing values (geom_point).
> plot + xlim(0,0.5) + ylim(0,100)
Warning message:
Removed 66539 rows containing missing values (geom_point).
> plot + xlim(0,0.2) + ylim(0,100)
Warning message:
Removed 83097 rows containing missing values (geom_point).
> g_bin7 <- subset(temp, gran_ratio < 0.13 & Sequencing_depth > 5)
> plot <- ggplot(g_bin7, aes(x=gran_ratio, y=isolation_bias, fill=bin, size=Contig_length)) + geom_point(alpha=0.5,
shape=21)
> plot
> g_bin7 <- subset(g_bin7, isolation_bias < 0.7)
> plot <- ggplot(g_bin7, aes(x=gran_ratio, y=isolation_bias, fill=bin, size=Contig_length)) + geom_point(alpha=0.5,
shape=21)
> plot
> g_bin7 <- subset(g_bin7, isolation_bias > 0.2 & gran_ratio > 0.01)
> plot <- ggplot(g_bin7, aes(x=gran_ratio, y=isolation_bias, fill=bin, size=Contig_length)) + geom_point(alpha=0.5,
shape=21)
> plot
> plot <- ggplot(g_bin7, aes(x=GC_content, y=Sequencing_depth, fill=bin, size=Contig_length)) +
geom_point(alpha=0.5, shape=21)
> plot
> g_bin7 <- subset(g_bin7, Sequencing_depth > 10)
> plot <- ggplot(g_bin7, aes(x=gran_ratio, y=isolation_bias, fill=bin, size=Contig_length)) + geom_point(alpha=0.5,
shape=21)
> plot
> rda <- rda(g_bin7[,13:268], data=g_bin7[,1:12], scale=T)
> X_scores <- scores(rda, choices = 1:5)$sites
> g_bin7_all <- cbind
> g_bin7_all <- cbind(g_bin7, X_scores)
> pairs(g_bin7_all[,269:273], upper.panel=NULL)
> plot <- ggplot(g_bin7_all, aes(x=PC1, y=PC2, fill=bin, size=Contig_length)) + geom_point(alpha=0.5, shape=21)
> plot
> g_bin7_all <- subset(g_bin7_all, PC1 < 0.8)
> plot <- ggplot(g_bin7_all, aes(x=PC3, y=PC2, fill=bin, size=Contig_length)) + geom_point(alpha=0.5, shape=21)
> plot
> g_bin7_all <- subset(g_bin7_all, PC2 < 1)
> g_bin7_all <- subset(g_bin7_all, PC3 < 1)
> plot <- ggplot(g_bin7_all, aes(x=isolation_bias, y=gran_ratio, fill=bin, size=Contig_length)) +
geom_point(alpha=0.5, shape=21)
> plot
> temp <- temp[!(temp$Contig %in% g_bin7_all$Contig), ]
> plot <- ggplot(temp, aes(x=gran_ratio, y=Sequencing_depth, fill=bin, size=Contig_length)) + geom_point(alpha=0.5,
shape=21)

```

```

> plot + xlim(0,0.5) + ylim(0,100)
Warning message:
Removed 66539 rows containing missing values (geom_point).
> h_bin8 <- subset(temp, gran_ratio < 0.3 & Sequencing_depth > 10)
> plot <- ggplot(temp, aes(x=gran_ratio, y=isolation_bias, fill=bin, size=Contig_length)) + geom_point(alpha=0.5,
shape=21)
> plot
> plot <- ggplot(h_bin8, aes(x=gran_ratio, y=isolation_bias, fill=bin, size=Contig_length)) + geom_point(alpha=0.5,
shape=21)
> plot
> h_bin8 <- subset(h_bin8, gran_ratio < 0.25 & isolation_bias > 0.2)
> plot <- ggplot(h_bin8, aes(x=gran_ratio, y=isolation_bias, fill=bin, size=Contig_length)) + geom_point(alpha=0.5,
shape=21)
> plot
> h_bin8 <- subset(temp, gran_ratio < 0.2 & gran_ratio > 0.1)
> h_bin8 <- subset(temp, gran_ratio < 0.3 & Sequencing_depth > 10)
> h_bin8 <- subset(h_bin8, gran_ratio < 0.25 & isolation_bias > 0.2)
> h_bin8 <- subset(h_bin8, gran_ratio < 0.2 & gran_ratio > 0.1)
> plot <- ggplot(h_bin8, aes(x=gran_ratio, y=isolation_bias, fill=bin, size=Contig_length)) + geom_point(alpha=0.5,
shape=21)
> plot
> rda <- rda(h_bin8[,13:268], data=h_bin8[,1:12], scale=T)
> X_scores <- scores(rda, choices = 1:5)$sites
> h_bin8_all <- cbind(h_bin8,X_scores)
> pairs(h_bin8_all[,269:273], upper.panel=NULL)
> plot <- ggplot(h_bin8_all, aes(x=PC1, y=PC2, fill=bin, size=Contig_length)) + geom_point(alpha=0.5, shape=21)
> plot
> plot <- ggplot(h_bin8_all, aes(x=PC2, y=PC3, fill=bin, size=Contig_length)) + geom_point(alpha=0.5, shape=21)
> plot
> plot <- ggplot(h_bin8_all, aes(x=GC_content, y=Sequencing_depth, fill=bin, size=Contig_length)) +
geom_point(alpha=0.5, shape=21)
> plot
> h_bin8_all <- subset(h_bin8_all, PC1 < 1)
> plot <- ggplot(h_bin8_all, aes(x=GC_content, y=Sequencing_depth, fill=bin, size=Contig_length)) +
geom_point(alpha=0.5, shape=21)
> plot
> plot <- ggplot(h_bin8_all, aes(x=PC1, y=PC2, fill=bin, size=Contig_length)) + geom_point(alpha=0.5, shape=21)
> plot
> h_bin8_all <- subset(h_bin8_all, PC1 > -1)
> h_bin8_all <- subset(h_bin8_all, PC2 < 2)
> plot <- ggplot(h_bin8_all, aes(x=GC_content, y=Sequencing_depth, fill=bin, size=Contig_length)) +
geom_point(alpha=0.5, shape=21)
> plot
> temp <- temp[!(temp$Contig %in% h_bin8_all$Contig), ]
> plot <- ggplot(temp, aes(x=gran_ratio, y=Sequencing_depth, fill=bin, size=Contig_length)) + geom_point(alpha=0.5,
shape=21)
> plot + xlim(0,0.5) + ylim(0,100)
Warning message:
Removed 66539 rows containing missing values (geom_point).
> plot + xlim(0,5) + ylim(0,100)
Warning message:
Removed 876 rows containing missing values (geom_point).
> plot + xlim(0,1) + ylim(0,100)
Warning message:

```

Removed 37843 rows containing missing values (geom\_point).

```
> plot + xlim(0.2,0.8) + ylim(0,75)
```

Warning message:

Removed 56481 rows containing missing values (geom\_point).

```
> i_bin9 <- subset(temp, gran_ratio > 0.4 & gran_ratio < 1 & Sequencing_depth > 10)
```

```
> plot <- ggplot(i_bin9, aes(x=gran_ratio, y=isolation_bias, fill=bin, size=Contig_length)) + geom_point(alpha=0.5, shape=21)
```

```
> plot
```

```
> i_bin9 <- subset(i_bin9, isolation_bias < 0.4 & gran_ratio < 0.85)
```

```
> plot <- ggplot(i_bin9, aes(x=gran_ratio, y=isolation_bias, fill=bin, size=Contig_length)) + geom_point(alpha=0.5, shape=21)
```

```
> plot
```

```
> plot <- ggplot(i_bin9, aes(x=GC_content, y=Sequencing_depth, fill=bin, size=Contig_length)) + geom_point(alpha=0.5, shape=21)
```

```
> plot
```

```
> i_bin9 <- subset(i_bin9, isolation_bias < 0.35 & gran_ratio < 0.75)
```

```
> i_bin9 <- subset(i_bin9, isolation_bias > 0.1)
```

```
> plot <- ggplot(i_bin9, aes(x=gran_ratio, y=isolation_bias, fill=bin, size=Contig_length)) + geom_point(alpha=0.5, shape=21)
```

```
> plot
```

```
> rda <- rda(i_bin9[,13:268], data=i_bin9[,1:12], scale=T)
```

```
> X_scores <- scores(rda, choices = 1:5)$sites
```

```
> i_bin9_all <- cbind(i_bin9, X_scores)
```

```
> pairs(i_bin9_all[,269:273], upper.panel=NULL)
```

```
> plot <- ggplot(i_bin9_all, aes(x=PC1, y=PC2, fill=bin, size=Contig_length)) + geom_point(alpha=0.5, shape=21)
```

```
> plot
```

```
> i_bin9_all <- subset(i_bin9_all, PC1 < 0.2 & PC2 > -0.5)
```

```
> plot <- ggplot(i_bin9_all, aes(x=PC1, y=PC2, fill=bin, size=Contig_length)) + geom_point(alpha=0.5, shape=21)
```

```
> plot
```

```
> plot <- ggplot(i_bin9_all, aes(x=gran_ratio, y=isolation_bias, fill=bin, size=Contig_length)) + geom_point(alpha=0.5, shape=21)
```

```
> plot
```

```
> plot <- ggplot(i_bin9_all, aes(x=GC_content, y=Sequencing_depth, fill=bin, size=Contig_length)) + geom_point(alpha=0.5, shape=21)
```

```
> plot
```

```
> i_bin9_all <- subset(i_bin9_all, GC_content > 0.55)
```

```
> i_bin9 <- i_bin9_all[-c(269:273)]
```

```
> rda <- rda(i_bin9[,13:268], data=i_bin9[,1:12], scale=T)
```

```
> X_scores <- scores(rda, choices = 1:5)$sites
```

```
> i_bin9_all <- cbind(i_bin9, X_scores)
```

```
> pairs(i_bin9_all[,269:273], upper.panel=NULL)
```

```
> plot <- ggplot(i_bin9_all, aes(x=PC1, y=PC2, fill=bin, size=Contig_length)) + geom_point(alpha=0.5, shape=21)
```

```
> plot
```

```
> i_bin9_all <- subset(i_bin9_all, PC2 > -1 & PC2 < 1 & PC1 < 0.5)
```

```
> plot <- ggplot(i_bin9_all, aes(x=PC1, y=PC3, fill=bin, size=Contig_length)) + geom_point(alpha=0.5, shape=21)
```

```
> plot
```

```
> i_bin9_all <- subset(i_bin9_all, PC3 < 0.5)
```

```
> plot <- ggplot(i_bin9_all, aes(x=gran_ratio, y=isolation_bias, fill=bin, size=Contig_length)) + geom_point(alpha=0.5, shape=21)
```

```
> plot
```

```
> plot <- ggplot(i_bin9_all, aes(x=GC_content, y=Sequencing_depth, fill=bin, size=Contig_length)) + geom_point(alpha=0.5, shape=21)
```

```
> plot
```

```
> plot + ylim(0,50)
```

Warning message:

Removed 6 rows containing missing values (geom\_point).

```
> i_bin9_all <- subset(i_bin9_all, Sequencing_depth > 20 | GC_content > 0.624 )
> plot <- ggplot(i_bin9_all, aes(x=gran_ratio, y=isolation_bias, fill=bin, size=Contig_length)) +
geom_point(alpha=0.5, shape=21)
> plot
> i_bin9 <- i_bin9_all[-c(269:273)]
> rda <- rda(i_bin9[,13:268], data=i_bin9[,1:12], scale=T)
> X_scores <- scores(rda, choices = 1:5)$sites
> i_bin9_all <- cbind(i_bin9, X_scores)
> pairs(i_bin9_all[,269:273], upper.panel=NULL)
> plot <- ggplot(i_bin9_all, aes(x=PC1, y=PC2, fill=bin, size=Contig_length)) + geom_point(alpha=0.5, shape=21)
> plot
> plot <- ggplot(i_bin9_all, aes(x=gran_ratio, y=PC2, fill=bin, size=Contig_length)) + geom_point(alpha=0.5,
shape=21)
> plot
> plot <- ggplot(i_bin9_all, aes(x=isolation_bias, y=PC2, fill=bin, size=Contig_length)) + geom_point(alpha=0.5,
shape=21)
> plot
> plot <- ggplot(i_bin9_all, aes(x=isolation_bias, y=PC1, fill=bin, size=Contig_length)) + geom_point(alpha=0.5,
shape=21)
> plot
> plot <- ggplot(i_bin9_all, aes(x=gran_ratio, y=PC1, fill=bin, size=Contig_length)) + geom_point(alpha=0.5,
shape=21)
> plot
> plot <- ggplot(i_bin9_all, aes(x=GC_content, y=PC1, fill=bin, size=Contig_length)) + geom_point(alpha=0.5,
shape=21)
> plot
> plot <- ggplot(i_bin9_all, aes(x=GC_content, y=PC2, fill=bin, size=Contig_length)) + geom_point(alpha=0.5,
shape=21)
> plot
> plot <- ggplot(i_bin9_all, aes(x=Sequencing_depth, y=PC1, fill=bin, size=Contig_length)) + geom_point(alpha=0.5,
shape=21)
> plot
> plot <- ggplot(i_bin9_all, aes(x=Sequencing_depth, y=PC2, fill=bin, size=Contig_length)) + geom_point(alpha=0.5,
shape=21)
> plot
> i_bin9_all <- subset(i_bin9_all, PC2 < 1.5)
> temp <- temp[!(temp$Contig %in% i_bin9_all$Contig), ]
> plot <- ggplot(temp, aes(x=gran_ratio, y=Sequencing_depth, fill=bin, size=Contig_length)) + geom_point(alpha=0.5,
shape=21)
> plot
> plot + xlim(0.2,0.8) + ylim(0,75)
```

Warning message:

Removed 56480 rows containing missing values (geom\_point).

```
> j_bin10 <- subset(temp, gran_ratio > 0.4 & gran_ratio < 0.8 & Sequencing_depth > 15)
> plot <- ggplot(j_bin10, aes(x=gran_ratio, y=isolation_bias, fill=bin, size=Contig_length)) + geom_point(alpha=0.5,
shape=21)
> plot
> j_bin10 <- subset(j_bin10, gran_ratio > 0.45 & gran_ratio < 0.7)
> j_bin10 <- subset(j_bin10, isolation_bias > 0.25 & isolation_bias < 0.7)
> plot <- ggplot(j_bin10, aes(x=gran_ratio, y=isolation_bias, fill=bin, size=Contig_length)) + geom_point(alpha=0.5,
shape=21)
> plot
```



```

> rda <- rda(j_bin10[,13:268], data=j_bin10[,1:12], scale=T)
> X_scores <- scores(rda, choices = 1:5)$sites
> j_bin10_all <- cbind(j_bin10, X_scores)
> pairs(j_bin10_all[,269:273], upper.panel=NULL)
> plot <- ggplot(j_bin10_all, aes(x=PC1, y=PC2, fill=bin, size=Contig_length)) + geom_point(alpha=0.5, shape=21)
> plot
> j_bin10_all <- subset(j_bin10_all, PC1 < 0 & PC2 > -1)
> plot <- ggplot(j_bin10_all, aes(x=PC1, y=PC2, fill=bin, size=Contig_length)) + geom_point(alpha=0.5, shape=21)
> plot
> j_bin10_all <- subset(j_bin10_all, PC1 < 0.75 & PC2 > -0.5 & PC2 < 2)
> plot <- ggplot(j_bin10_all, aes(x=PC1, y=PC2, fill=bin, size=Contig_length)) + geom_point(alpha=0.5, shape=21)
> plot
> plot <- ggplot(j_bin10_all, aes(x=PC1, y=PC3, fill=bin, size=Contig_length)) + geom_point(alpha=0.5, shape=21)
> plot
> j_bin10_all <- subset(j_bin10_all, PC1 < -0.25 & PC3 > -0.5)
> plot <- ggplot(j_bin10_all, aes(x=gran_ratio, y=isolation_bias, fill=bin, size=Contig_length)) +
geom_point(alpha=0.5, shape=21)
> plot
> plot <- ggplot(j_bin10_all, aes(x=GC_content, y=Sequencing_depth, fill=bin, size=Contig_length)) +
geom_point(alpha=0.5, shape=21)
> plot
> plot <- ggplot(j_bin10_all, aes(x=PC1, y=PC3, fill=bin, size=Contig_length)) + geom_point(alpha=0.5, shape=21)
> plot
> plot <- ggplot(j_bin10_all, aes(x=PC1, y=PC2, fill=bin, size=Contig_length)) + geom_point(alpha=0.5, shape=21)
> plot
> temp <- temp[!(temp$Contig %in% j_bin10_all$Contig), ]
> plot <- ggplot(temp, aes(x=gran_ratio, y=Sequencing_depth, fill=bin, size=Contig_length)) + geom_point(alpha=0.5,
shape=21)
> plot + xlim(0.2,1) + ylim(0,75)
Warning message:
Removed 46117 rows containing missing values (geom_point).
> k_bin11 <- subset(temp, gran_ratio < 0.6 & Sequencing_depth > 5)
> k_bin11 <- subset(k_bin11, gran_ratio > 0.2)
> k_bin11 <- subset(k_bin11, isolation_bias < 0.8)
> k_bin11 <- subset(k_bin11, isolation_bias > 0.2)
> plot <- ggplot(k_bin11, aes(x=gran_ratio, y=isolation_bias, fill=bin, size=Contig_length)) + geom_point(alpha=0.5,
shape=21)
> plot
> k_bin11 <- subset(k_bin11, isolation_bias > 0.3)
> plot <- ggplot(k_bin11, aes(x=gran_ratio, y=isolation_bias, fill=bin, size=Contig_length)) + geom_point(alpha=0.5,
shape=21)
> plot
> k_bin11 <- subset(k_bin11, gran_ratio < 0.55)
> k_bin11 <- subset(k_bin11, isolation_bias > 0.35)
> rda <- rda(k_bin11[,13:268], data=k_bin11[,1:12], scale=T)
> X_scores <- scores(rda, choices = 1:5)$sites
> k_bin11_all <- cbind(k_bin11, X_scores)
> pairs(k_bin11_all[,269:273], upper.panel=NULL)
> plot <- ggplot(k_bin11_all, aes(x=PC1, y=PC2, fill=bin, size=Contig_length)) + geom_point(alpha=0.5, shape=21)
> plot
> plot <- ggplot(k_bin11_all, aes(x=PC1, y=PC4, fill=bin, size=Contig_length)) + geom_point(alpha=0.5, shape=21)
> plot
> k_bin11_all <- subset(k_bin11_all, PC1 < 0)
> k_bin11_all <- subset(k_bin11_all, PC4 < 0.5)

```



```

> plot <- ggplot(k_bin11_all, aes(x=PC1, y=PC2, fill=bin, size=Contig_length)) + geom_point(alpha=0.5, shape=21)
> plot
> plot <- ggplot(k_bin11_all, aes(x=gran_ratio, y=isolation_bias, fill=bin, size=Contig_length)) +
geom_point(alpha=0.5, shape=21)
> plot
> k_bin11_all <- subset(k_bin11_all, isolation_bias < 0.6)
> k_bin11_all <- subset(k_bin11_all, gran_ratio > 0.3)
> plot <- ggplot(k_bin11_all, aes(x=gran_ratio, y=isolation_bias, fill=bin, size=Contig_length)) +
geom_point(alpha=0.5, shape=21)
> plot
> k_bin11 <- k_bin11_all[-c(269:273)]
> rda <- rda(k_bin11[,13:268], data=k_bin11[,1:12], scale=T)
> X_scores <- scores(rda, choices = 1:5)$sites
> k_bin11_all <- cbind(k_bin11, X_scores)
> pairs(k_bin11_all[,269:273], upper.panel=NULL)
> plot <- ggplot(k_bin11_all, aes(x=PC1, y=PC3, fill=bin, size=Contig_length)) + geom_point(alpha=0.5, shape=21)
> plot
> k_bin11_all <- subset(k_bin11_all, PC1 < 0 & PC3 < 0)
> plot <- ggplot(k_bin11_all, aes(x=gran_ratio, y=isolation_bias, fill=bin, size=Contig_length)) +
geom_point(alpha=0.5, shape=21)
> plot
> temp <- temp[!(temp$Contig %in% k_bin11_all$Contig), ]
> plot <- ggplot(temp, aes(x=gran_ratio, y=Sequencing_depth, fill=bin, size=Contig_length)) + geom_point(alpha=0.5,
shape=21)
> plot
> plot + xlim(0,5) + ylim(0,75)
Warning message:
Removed 918 rows containing missing values (geom_point).
> plot + xlim(1,2) + ylim(0,75)
Warning message:
Removed 61781 rows containing missing values (geom_point).
> l_bin12 <- subset(temp, gran_ratio > 1 & gran_ratio < 1.5 & Sequencing_depth > 5)
> plot <- ggplot(l_bin12, aes(x=gran_ratio, y=isolation_bias, fill=bin, size=Contig_length)) + geom_point(alpha=0.5,
shape=21)
> plot
> l_bin12 <- subset(l_bin12, isolation_bias < 0.5)
> plot <- ggplot(l_bin12, aes(x=gran_ratio, y=isolation_bias, fill=bin, size=Contig_length)) + geom_point(alpha=0.5,
shape=21)
> plot
> l_bin12 <- subset(l_bin12, isolation_bias < 0.4)
> l_bin12 <- subset(l_bin12, isolation_bias > 0.05)
> l_bin12 <- subset(l_bin12, gran_ratio > 1.05)
> l_bin12 <- subset(l_bin12, gran_ratio < 1.45)
> plot <- ggplot(l_bin12, aes(x=gran_ratio, y=isolation_bias, fill=bin, size=Contig_length)) + geom_point(alpha=0.5,
shape=21)
> plot
> rda <- rda(l_bin12[,13:268], data=l_bin12[,1:12], scale=T)
> X_scores <- scores(rda, choices = 1:5)$sites
> l_bin12_all <- cbind(l_bin12, X_scores)
> pairs(l_bin12_all[,269:273], upper.panel=NULL)
> plot <- ggplot(l_bin12_all, aes(x=PC1, y=PC2, fill=bin, size=Contig_length)) + geom_point(alpha=0.5, shape=21)
> plot
> l_bin12_all <- subset(l_bin12_all, PC1 > -0.2 & PC1 < 0.6)
> l_bin12_all <- subset(l_bin12_all, PC2 > -0.5 & PC2 < 0.6)

```

```

> plot <- ggplot(l_bin12_all, aes(x=PC1, y=PC2, fill=bin, size=Contig_length)) + geom_point(alpha=0.5, shape=21)
> plot
> l_bin12_all <- subset(l_bin12_all, PC2 > -0.2 & PC2 < 0.5)
> l_bin12_all <- subset(l_bin12_all, PC1 > -0.1 & PC1 < 0.5)
> l_bin12 <- l_bin12_all[-c(269:273)]
> rda <- rda(l_bin12[,13:268], data=l_bin12[,1:12], scale=T)
> X_scores <- scores(rda, choices = 1:5)$sites
> l_bin12_all <- cbind(l_bin12, X_scores)
> pairs(l_bin12_all[,269:273], upper.panel=NULL)
> plot <- ggplot(l_bin12_all, aes(x=PC1, y=PC2, fill=bin, size=Contig_length)) + geom_point(alpha=0.5, shape=21)
> plot
> l_bin12_all <- subset(l_bin12_all, PC1 > 0)
> l_bin12_all <- subset(l_bin12_all, PC2 > -1)
> plot <- ggplot(l_bin12_all, aes(x=gran_ratio, y=isolation_bias, fill=bin, size=Contig_length)) +
geom_point(alpha=0.5, shape=21)
> plot
> l_bin12_all <- subset(l_bin12_all, isolation_bias < 0.3)
> plot <- ggplot(l_bin12_all, aes(x=GC_content, y=Sequencing_depth, fill=bin, size=Contig_length)) +
geom_point(alpha=0.5, shape=21)
> plot
> l_bin12_all <- subset(l_bin12_all, Sequencing_depth > 12)
> plot <- ggplot(l_bin12_all, aes(x=GC_content, y=Sequencing_depth, fill=bin, size=Contig_length)) +
geom_point(alpha=0.5, shape=21)
> plot
> plot <- ggplot(l_bin12_all, aes(x=gran_ratio, y=isolation_bias, fill=bin, size=Contig_length)) +
geom_point(alpha=0.5, shape=21)
> plot
> l_bin12_all <- subset(l_bin12_all, GC_content > 0.5)
> plot <- ggplot(l_bin12_all, aes(x=gran_ratio, y=isolation_bias, fill=bin, size=Contig_length)) +
geom_point(alpha=0.5, shape=21)
> plot
> l_bin12 <- l_bin12_all[-c(269:273)]
> rda <- rda(l_bin12[,13:268], data=l_bin12[,1:12], scale=T)
> X_scores <- scores(rda, choices = 1:5)$sites
> l_bin12_all <- cbind(l_bin12, X_scores)
> pairs(l_bin12_all[,269:273], upper.panel=NULL)
> plot <- ggplot(l_bin12_all, aes(x=PC1, y=PC2, fill=bin, size=Contig_length)) + geom_point(alpha=0.5, shape=21)
> plot
> l_bin12_all <- subset(l_bin12_all, PC1 > -2)
> temp <- temp[!(temp$Contig %in% l_bin12_all$Contig), ]
> plot <- ggplot(temp, aes(x=gran_ratio, y=Sequencing_depth, fill=bin, size=Contig_length)) + geom_point(alpha=0.5,
shape=21)
> plot + xlim(1,2) + ylim(0,75)
Warning message:
Removed 61781 rows containing missing values (geom_point).
> m_bin13 <- subset(temp, gran_ratio > 1.3 & gran_ratio < 2 & Sequencing_depth > 10)
> m_bin13 <- subset(m_bin13, isolation_bias < 0.5)
> m_bin13 <- subset(m_bin13, isolation_bias > 0.1)
> m_bin13 <- subset(m_bin13, gran_ratio < 1.8)
> rda <- rda(m_bin13[,13:268], data=m_bin13[,1:12], scale=T)
> X_scores <- scores(rda, choices = 1:5)$sites
> m_bin13_all <- cbind(m_bin13, X_scores)
> pairs(m_bin13_all[,269:273], upper.panel=NULL)
> plot <- ggplot(m_bin13_all, aes(x=PC1, y=PC2, fill=bin, size=Contig_length)) + geom_point(alpha=0.5, shape=21)

```

```

> plot
> m_bin13_all <- subset(m_bin13_all, PC2 < 0.8 & PC1 > -1 & PC1 < 0.5 & PC2 > -1)
> plot <- ggplot(m_bin13_all, aes(x=PC1, y=PC2, fill=bin, size=Contig_length)) + geom_point(alpha=0.5, shape=21)
> plot
> m_bin13_all <- subset(m_bin13_all, PC2 < 0.8 & PC1 > -1 & PC1 < 0.5 & PC2 > -0.5)
> m_bin13_all <- subset(m_bin13_all, PC2 < 0.8 & PC1 > -0.75 & PC1 < 0.25 & PC2 > -0.5)
> plot <- ggplot(m_bin13_all, aes(x=PC1, y=PC2, fill=bin, size=Contig_length)) + geom_point(alpha=0.5, shape=21)
> plot
> plot <- ggplot(m_bin13_all, aes(x=gran_ratio, y=isolation_bias, fill=bin, size=Contig_length)) +
geom_point(alpha=0.5, shape=21)
> plot
> m_bin13_all <- subset(m_bin13_all, isolation_bias < 0.3)
> m_bin13_all <- subset(m_bin13_all, isolation_bias > 0.15)
> plot <- ggplot(m_bin13_all, aes(x=gran_ratio, y=isolation_bias, fill=bin, size=Contig_length)) +
geom_point(alpha=0.5, shape=21)
> plot
> m_bin13 <- m_bin13_all[-c(269:273)]
> rda <- rda(m_bin13[,13:268], data=m_bin13[,1:12], scale=T)
> X_scores <- scores(rda, choices = 1:5)$sites
> m_bin13_all <- cbind(m_bin13, X_scores)
> pairs(m_bin13_all[,269:273], upper.panel=NULL)
> plot <- ggplot(m_bin13_all, aes(x=PC1, y=PC2, fill=bin, size=Contig_length)) + geom_point(alpha=0.5, shape=21)
> plot
> plot <- ggplot(m_bin13_all, aes(x=PC1, y=PC3, fill=bin, size=Contig_length)) + geom_point(alpha=0.5, shape=21)
> plot
> m_bin13_all <- subset(m_bin13_all, PC3 < -1)
> plot <- ggplot(m_bin13_all, aes(x=gran_ratio, y=isolation_bias, fill=bin, size=Contig_length)) +
geom_point(alpha=0.5, shape=21)
> plot
> m_bin13_all <- subset(m_bin13_all, isolation_bias > 0.17)
> m_bin13_all <- subset(m_bin13_all, isolation_bias < 0.27)
> plot <- ggplot(m_bin13_all, aes(x=GC_content, y=Sequencing_depth, fill=bin, size=Contig_length)) +
geom_point(alpha=0.5, shape=21)
> plot
> temp <- temp[!(temp$Contig %in% m_bin13_all$Contig), ]
> plot <- ggplot(temp, aes(x=gran_ratio, y=Sequencing_depth, fill=bin, size=Contig_length)) + geom_point(alpha=0.5,
shape=21)
> plot + xlim(1,2) + ylim(0,75)
Warning message:
Removed 61781 rows containing missing values (geom_point).
> n_bin14 <- subset(temp, gran_ratio > 1.3 & gran_ratio < 2.5 & Sequencing_depth > 10)
> plot <- ggplot(n_bin14, aes(x=gran_ratio, y=isolation_bias, fill=bin, size=Contig_length)) + geom_point(alpha=0.5,
shape=21)
> plot
> n_bin14 <- subset(n_bin14, isolation_bias < 0.5)
> plot <- ggplot(n_bin14, aes(x=gran_ratio, y=isolation_bias, fill=bin, size=Contig_length)) + geom_point(alpha=0.5,
shape=21)
> plot
> n_bin14 <- subset(n_bin14, isolation_bias < 0.3)
> n_bin14 <- subset(n_bin14, gran_ratio < 2.2)
> plot <- ggplot(n_bin14, aes(x=gran_ratio, y=isolation_bias, fill=bin, size=Contig_length)) + geom_point(alpha=0.5,
shape=21)
> plot
> rda <- rda(n_bin14[,13:268], data=n_bin14[,1:12], scale=T)

```

```

> X_scores <- scores(rda, choices = 1:5)$sites
> n_bin14_all <- cbind(n_bin14, X_scores)
> pairs(n_bin14_all[,269:273], upper.panel=NULL)
> plot <- ggplot(n_bin14_all, aes(x=PC1, y=PC2, fill=bin, size=Contig_length)) + geom_point(alpha=0.5, shape=21)
> plot
> n_bin14_all <- subset(n_bin14_all, PC1 > -1 & PC1 < 0.5)
> n_bin14_all <- subset(n_bin14_all, PC2 > -0.5 & PC2 < 1)
> plot <- ggplot(n_bin14_all, aes(x=PC1, y=PC2, fill=bin, size=Contig_length)) + geom_point(alpha=0.5, shape=21)
> plot
> n_bin14_all <- subset(n_bin14_all, PC2 > 0 & PC2 < 0.7)
> n_bin14_all <- subset(n_bin14_all, PC1 > -0.7 & PC1 < 0)
> plot <- ggplot(n_bin14, aes(x=gran_ratio, y=isolation_bias, fill=bin, size=Contig_length)) + geom_point(alpha=0.5,
shape=21)
> plot
> plot <- ggplot(n_bin14_all, aes(x=gran_ratio, y=isolation_bias, fill=bin, size=Contig_length)) +
geom_point(alpha=0.5, shape=21)
> plot
> n_bin14_all <- subset(n_bin14_all, isolation_bias < 0.2)
> n_bin14_all <- subset(n_bin14_all, gran_ratio > 1.5)
> plot <- ggplot(n_bin14_all, aes(x=gran_ratio, y=isolation_bias, fill=bin, size=Contig_length)) +
geom_point(alpha=0.5, shape=21)
> plot
> n_bin14 <- n_bin14_all[-c(269:273)]
> rda <- rda(n_bin14[,13:268], data=n_bin14[,1:12], scale=T)
> X_scores <- scores(rda, choices = 1:5)$sites
> n_bin14_all <- cbind(n_bin14, X_scores)
> pairs(n_bin14_all[,269:273], upper.panel=NULL)
> plot <- ggplot(n_bin14_all, aes(x=PC1, y=PC3, fill=bin, size=Contig_length)) + geom_point(alpha=0.5, shape=21)
> plot
> n_bin14_all <- subset(n_bin14_all, PC1 > 0.5 & PC3 > 0.1)
> plot <- ggplot(n_bin14_all, aes(x=PC1, y=PC3, fill=bin, size=Contig_length)) + geom_point(alpha=0.5, shape=21)
> plot
> plot <- ggplot(n_bin14_all, aes(x=gran_ratio, y=isolation_bias, fill=bin, size=Contig_length)) +
geom_point(alpha=0.5, shape=21)
> plot
> temp <- temp[!(temp$Contig %in% n_bin14_all$Contig), ]
> plot <- ggplot(temp, aes(x=gran_ratio, y=Sequencing_depth, fill=bin, size=Contig_length)) + geom_point(alpha=0.5,
shape=21)
> plot + xlim(0,3) + ylim(0,75)
Warning message:
Removed 3011 rows containing missing values (geom_point).
> plot + xlim(0,1) + ylim(0,30)
Warning message:
Removed 37932 rows containing missing values (geom_point).
> o_bin15 <- subset(temp, gran_ratio > 0.3 & gran_ratio < 1 & Sequencing_depth > 5)
> plot <- ggplot(o_bin15, aes(x=gran_ratio, y=isolation_bias, fill=bin, size=Contig_length)) + geom_point(alpha=0.5,
shape=21)
> plot
> o_bin15 <- subset(o_bin15, isolation_bias < 0.5)
> plot <- ggplot(o_bin15, aes(x=gran_ratio, y=isolation_bias, fill=bin, size=Contig_length)) + geom_point(alpha=0.5,
shape=21)
> plot
> o_bin15 <- subset(o_bin15, isolation_bias < 0.3)
> o_bin15 <- subset(o_bin15, gran_ratio > 0.4 & gran_ratio < 0.8)

```

```

> rda <- rda(o_bin15[,13:268], data=o_bin15[,1:12], scale=T)
> X_scores <- scores(rda, choices = 1:5)$sites
> o_bin15_all <- cbind(o_bin15,X_scores)
> pairs(o_bin15_all[,269:273], upper.panel=NULL)
> plot <- ggplot(o_bin15_all, aes(x=PC1, y=PC2, fill=bin, size=Contig_length)) + geom_point(alpha=0.5, shape=21)
> plot
> plot <- ggplot(o_bin15_all, aes(x=PC1, y=PC3, fill=bin, size=Contig_length)) + geom_point(alpha=0.5, shape=21)
> plot
> o_bin15_all <- subset(o_bin15_all, PC1 > 0.2 & PC3 < 0.5)
> plot <- ggplot(o_bin15_all, aes(x=PC1, y=PC3, fill=bin, size=Contig_length)) + geom_point(alpha=0.5, shape=21)
> plot
> o_bin15_all <- subset(o_bin15_all, PC3 > -0.5 & PC3 < 0.2)
> o_bin15_all <- subset(o_bin15_all, PC1 > 0.3)
> plot <- ggplot(o_bin15_all, aes(x=PC1, y=PC3, fill=bin, size=Contig_length)) + geom_point(alpha=0.5, shape=21)
> plot
> o_bin15_all <- subset(o_bin15_all, PC3 < 0)
> plot <- ggplot(o_bin15_all, aes(x=gran_ratio, y=isolation_bias, fill=bin, size=Contig_length)) +
geom_point(alpha=0.5, shape=21)
> plot
> o_bin15_all <- subset(o_bin15_all, isolation_bias < 0.2)
> o_bin15_all <- subset(o_bin15_all, gran_ratio > 0.5)
> o_bin15 <- o_bin15_all[-c(269:273)]
> rda <- rda(o_bin15[,13:268], data=o_bin15[,1:12], scale=T)
> X_scores <- scores(rda, choices = 1:5)$sites
> o_bin15_all <- cbind(o_bin15,X_scores)
> pairs(o_bin15_all[,269:273], upper.panel=NULL)
> plot <- ggplot(o_bin15_all, aes(x=PC1, y=PC3, fill=bin, size=Contig_length)) + geom_point(alpha=0.5, shape=21)
> plot
> o_bin15_all <- subset(o_bin15_all, PC3 < 0.5)
> o_bin15_all <- subset(o_bin15_all, PC1 > -1)
> plot <- ggplot(o_bin15_all, aes(x=PC1, y=PC3, fill=bin, size=Contig_length)) + geom_point(alpha=0.5, shape=21)
> plot
> plot <- ggplot(o_bin15_all, aes(x=gran_ratio, y=isolation_bias, fill=bin, size=Contig_length)) +
geom_point(alpha=0.5, shape=21)
> plot
> plot <- ggplot(o_bin15_all, aes(x=PC1, y=PC2, fill=bin, size=Contig_length)) + geom_point(alpha=0.5, shape=21)
> plot
> o_bin15_all <- subset(o_bin15_all, PC2 > -1)
> o_bin15_all <- subset(o_bin15_all, PC1 < 1)
> plot <- ggplot(o_bin15_all, aes(x=gran_ratio, y=isolation_bias, fill=bin, size=Contig_length)) +
geom_point(alpha=0.5, shape=21)
> plot
> plot <- ggplot(o_bin15_all, aes(x=GC_content, y=Sequencing_depth, fill=bin, size=Contig_length)) +
geom_point(alpha=0.5, shape=21)
> plot
> plot + ylim(0,50)
Warning message:
Removed 1 rows containing missing values (geom_point).
> o_bin15_all <- subset(o_bin15_all, Sequencing_depth > 10)
> temp <- temp[!(temp$Contig %in% o_bin15_all$Contig), ]
> plot <- ggplot(temp, aes(x=gran_ratio, y=Sequencing_depth, fill=bin, size=Contig_length)) + geom_point(alpha=0.5,
shape=21)
> plot + xlim(0,3) + ylim(0,50)
Warning message:

```

Removed 3151 rows containing missing values (geom\_point).

```
> p_bin16 <- subset(temp, gran_ratio > 1 & gran_ratio < 2 & Sequencing_depth > 10)
> plot <- ggplot(temp, aes(x=gran_ratio, y=isolation_bias, fill=bin, size=Contig_length)) + geom_point(alpha=0.5,
shape=21)
> plot
> plot <- ggplot(p_bin16, aes(x=gran_ratio, y=isolation_bias, fill=bin, size=Contig_length)) + geom_point(alpha=0.5,
shape=21)
> plot
> p_bin16 <- subset(p_bin16, isolation_bias < 0.4)
> plot <- ggplot(p_bin16, aes(x=gran_ratio, y=isolation_bias, fill=bin, size=Contig_length)) + geom_point(alpha=0.5,
shape=21)
> plot
> rda <- rda(p_bin16[,13:268], data=p_bin16[,1:12], scale=T)
> X_scores <- scores(rda, choices = 1:5)$sites
> p_bin16_all <- cbind(p_bin16,X_scores)
> pairs(p_bin16_all[,269:273], upper.panel=NULL)
> plot <- ggplot(p_bin16_all, aes(x=PC1, y=PC2, fill=bin, size=Contig_length)) + geom_point(alpha=0.5, shape=21)
> plot
> p_bin16_all <-subset(p_bin16_all, PC2 > 0 & PC1 > -0.5)
> plot <- ggplot(p_bin16_all, aes(x=PC1, y=PC2, fill=bin, size=Contig_length)) + geom_point(alpha=0.5, shape=21)
> plot
> plot <- ggplot(p_bin16_all, aes(x=PC4, y=PC2, fill=bin, size=Contig_length)) + geom_point(alpha=0.5, shape=21)
> plot
> plot <- ggplot(p_bin16_all, aes(x=gran_ratio, y=isolation_bias, fill=bin, size=Contig_length)) +
geom_point(alpha=0.5, shape=21)
> plot
> p_bin16_all <-subset(p_bin16_all,gran_ratio > 1.2)
> p_bin16_all <-subset(p_bin16_all, isolation_bias < 0.25)
> p_bin16 <- p_bin16_all[-c(269:273)]
> rda <- rda(p_bin16[,13:268], data=p_bin16[,1:12], scale=T)
> X_scores <- scores(rda, choices = 1:5)$sites
> p_bin16_all <- cbind(p_bin16,X_scores)
> pairs(p_bin16_all[,269:273], upper.panel=NULL)
> plot <- ggplot(p_bin16_all, aes(x=PC1, y=PC2, fill=bin, size=Contig_length)) + geom_point(alpha=0.5, shape=21)
> plot
> p_bin16_all <-subset(p_bin16_all, PC2 > -0.5)
> plot <- ggplot(p_bin16_all, aes(x=PC3, y=PC2, fill=bin, size=Contig_length)) + geom_point(alpha=0.5, shape=21)
> plot
> plot <- ggplot(p_bin16_all, aes(x=PC3, y=PC1, fill=bin, size=Contig_length)) + geom_point(alpha=0.5, shape=21)
> plot
> p_bin16_all <-subset(p_bin16_all, PC1 > 0 | PC3 < -1)
> plot <- ggplot(p_bin16_all, aes(x=PC3, y=PC1, fill=bin, size=Contig_length)) + geom_point(alpha=0.5, shape=21)
> plot
> plot <- ggplot(p_bin16_all, aes(x=gran_ratio, y=isolation_bias, fill=bin, size=Contig_length)) +
geom_point(alpha=0.5, shape=21)
> plot
> plot <- ggplot(p_bin16_all, aes(x=GC_content, y=Sequencing_depth, fill=bin, size=Contig_length)) +
geom_point(alpha=0.5, shape=21)
> plot
> plot + ylim(0,50)
Warning message:
Removed 2 rows containing missing values (geom_point).
> p_bin16_all <-subset(p_bin16_all, PC1 > 1 | PC3 < 0)
> plot <- ggplot(p_bin16_all, aes(x=PC3, y=PC1, fill=bin, size=Contig_length)) + geom_point(alpha=0.5, shape=21)
```



```

> plot
> p_bin16 <- p_bin16_all[-c(269:273)]
> rda <- rda(p_bin16[,13:268], data=p_bin16[,1:12], scale=T)
> X_scores <- scores(rda, choices = 1:5)$sites
> p_bin16_all <- cbind(p_bin16,X_scores)
> pairs(p_bin16_all[,269:273], upper.panel=NULL)
> plot <- ggplot(p_bin16_all, aes(x=PC1, y=PC2, fill=bin, size=Contig_length)) + geom_point(alpha=0.5, shape=21)
> plot
> p_bin16_all <- subset(p_bin16_all, PC1 > -1.5 & PC2 < 2)
> plot <- ggplot(p_bin16_all, aes(x=PC1, y=PC2, fill=bin, size=Contig_length)) + geom_point(alpha=0.5, shape=21)
> plot
> plot <- ggplot(p_bin16_all, aes(x=gran_ratio, y=isolation_bias, fill=bin, size=Contig_length)) +
geom_point(alpha=0.5, shape=21)
> plot
> plot <- ggplot(p_bin16_all, aes(x=GC_content, y=Sequencing_depth, fill=bin, size=Contig_length)) +
geom_point(alpha=0.5, shape=21)
> plot
> temp <- temp[!(temp$Contig %in% p_bin16_all$Contig), ]
> q_bin17 <- subset(temp, gran_ratio > 1 & gran_ratio < 2 & Sequencing_depth > 10)
> plot <- ggplot(temp, aes(x=gran_ratio, y=Sequencing_depth, fill=bin, size=Contig_length)) + geom_point(alpha=0.5,
shape=21)
> plot <- ggplot(q_bin17, aes(x=gran_ratio, y=Sequencing_depth, fill=bin, size=Contig_length)) +
geom_point(alpha=0.5, shape=21)
> plot
> plot + ylim(0,50)
Warning message:
Removed 81 rows containing missing values (geom_point).
> q_bin17 <- subset(q_bin17, gran_ratio > 1.2)
> plot <- ggplot(q_bin17, aes(x=gran_ratio, y=isolation_bias, fill=bin, size=Contig_length)) + geom_point(alpha=0.5,
shape=21)
> plot
> q_bin17 <- subset(q_bin17, isolation_bias < 0.4)
> plot <- ggplot(q_bin17, aes(x=gran_ratio, y=isolation_bias, fill=bin, size=Contig_length)) + geom_point(alpha=0.5,
shape=21)
> plot
> rda <- rda(q_bin17[,13:268], data=q_bin17[,1:12], scale=T)
> X_scores <- scores(rda, choices = 1:5)$sites
> q_bin17_all <- cbind(q_bin17,X_scores)
> pairs(q_bin17_all[,269:273], upper.panel=NULL)
> plot <- ggplot(q_bin17_all, aes(x=PC1, y=PC2, fill=bin, size=Contig_length)) + geom_point(alpha=0.5, shape=21)
> plot
> q_bin17_all <- subset(q_bin17_all, PC2 > 0.5)
> plot <- ggplot(q_bin17_all, aes(x=PC3, y=PC2, fill=bin, size=Contig_length)) + geom_point(alpha=0.5, shape=21)
> plot
> q_bin17_all <- subset(q_bin17_all, PC2 > 0.8 | PC3 > 0)
> plot <- ggplot(q_bin17_all, aes(x=PC3, y=PC2, fill=bin, size=Contig_length)) + geom_point(alpha=0.5, shape=21)
> plot
> q_bin17_all <- subset(q_bin17_all, PC3 > -0.5)
> plot <- ggplot(q_bin17_all, aes(x=PC3, y=PC2, fill=bin, size=Contig_length)) + geom_point(alpha=0.5, shape=21)
> plot
> q_bin17_all <- subset(q_bin17_all, PC2 > 0.7)
> q_bin17_all <- subset(q_bin17_all, PC3 < 1)
> plot <- ggplot(q_bin17_all, aes(x=gran_ratio, y=isolation_bias, fill=bin, size=Contig_length)) +
geom_point(alpha=0.5, shape=21)

```



```

> plot
> q_bin17_all <- subset(q_bin17_all, isolation_bias < 0.25)
> temp <- temp[!(temp$Contig %in% q_bin17_all$Contig), ]
> plot <- ggplot(q_bin17_all, aes(x=GC_content, y=Sequencing_depth, fill=bin, size=Contig_length)) +
geom_point(alpha=0.5, shape=21)
> plot
> r_bin18 <- subset(temp, gran_ratio > 1 & gran_ratio < 2 & Sequencing_depth > 5)
> plot <- ggplot(r_bin18, aes(x=gran_ratio, y=isolation_bias, fill=bin, size=Contig_length)) + geom_point(alpha=0.5,
shape=21)
> plot
> r_bin18 <- subset(r_bin18, isolation_bias < 0.4)
> plot <- ggplot(r_bin18, aes(x=gran_ratio, y=isolation_bias, fill=bin, size=Contig_length)) + geom_point(alpha=0.5,
shape=21)
> plot
> r_bin18 <- subset(r_bin18, gran_ratio > 1.2)
> r_bin18 <- subset(r_bin18, isolation_bias > 0.02)
> r_bin18 <- subset(r_bin18, isolation_bias < 0.25)
> rda <- rda(r_bin18[,13:268], data=r_bin18[,1:12], scale=T)
> X_scores <- scores(rda, choices = 1:5)$sites
> r_bin18_all <- cbind(r_bin18, X_scores)
> pairs(r_bin18_all[,269:273], upper.panel=NULL)
> plot <- ggplot(r_bin18_all, aes(x=PC1, y=PC2, fill=bin, size=Contig_length)) + geom_point(alpha=0.5, shape=21)
> plot
> r_bin18_all <- subset(r_bin18_all, PC1 > 0.2)
> plot <- ggplot(r_bin18_all, aes(x=PC1, y=PC2, fill=bin, size=Contig_length)) + geom_point(alpha=0.5, shape=21)
> plot
> plot <- ggplot(r_bin18_all, aes(x=PC3, y=PC2, fill=bin, size=Contig_length)) + geom_point(alpha=0.5, shape=21)
> plot
> r_bin18_all <- subset(r_bin18_all, PC2 < 0.4)
> plot <- ggplot(r_bin18_all, aes(x=gran_ratio, y=isolation_bias, fill=bin, size=Contig_length)) +
geom_point(alpha=0.5, shape=21)
> plot
> r_bin18_all <- subset(r_bin18_all, isolation_bias < 0.2)
> r_bin18 <- r_bin18_all[-c(269:273)]
> rda <- rda(r_bin18[,13:268], data=r_bin18[,1:12], scale=T)
> X_scores <- scores(rda, choices = 1:5)$sites
> r_bin18_all <- cbind(r_bin18, X_scores)
> pairs(r_bin18_all[,269:273], upper.panel=NULL)
> plot <- ggplot(r_bin18_all, aes(x=PC1, y=PC2, fill=bin, size=Contig_length)) + geom_point(alpha=0.5, shape=21)
> plot
> plot <- ggplot(r_bin18_all, aes(x=PC1, y=PC3, fill=bin, size=Contig_length)) + geom_point(alpha=0.5, shape=21)
> plot
> plot <- ggplot(r_bin18_all, aes(x=PC2, y=PC3, fill=bin, size=Contig_length)) + geom_point(alpha=0.5, shape=21)
> plot
> r_bin18_all <- subset(r_bin18_all, PC2 > -0.1)
> r_bin18_all <- subset(r_bin18_all, PC3 > -0.5)
> plot <- ggplot(r_bin18_all, aes(x=PC1, y=PC2, fill=bin, size=Contig_length)) + geom_point(alpha=0.5, shape=21)
> plot
> plot <- ggplot(r_bin18_all, aes(x=gran_ratio, y=isolation_bias, fill=bin, size=Contig_length)) +
geom_point(alpha=0.5, shape=21)
> plot
> r_bin18_all <- subset(r_bin18_all, PC1 > -1)
> r_bin18_all <- subset(r_bin18_all, PC1 > 0 | PC2 > 0.75)
> plot <- ggplot(r_bin18_all, aes(x=PC1, y=PC2, fill=bin, size=Contig_length)) + geom_point(alpha=0.5, shape=21)

```

```

> plot
> r_bin18_all <- subset(r_bin18_all, PC1 < 1)
> r_bin18 <- r_bin18_all[-c(269:273)]
> rda <- rda(r_bin18[13:268], data=r_bin18[,1:12], scale=T)
> X_scores <- scores(rda, choices = 1:5)$sites
> r_bin18_all <- cbind(r_bin18, X_scores)
> pairs(r_bin18_all[,269:273], upper.panel=NULL)
> plot <- ggplot(r_bin18_all, aes(x=PC1, y=PC2, fill=bin, size=Contig_length)) + geom_point(alpha=0.5, shape=21)
> plot
> s_bin19 <- subset(r_bin18_all, PC1 > 0 & PC2 < 0)
> r_bin18_all <- subset(r_bin18_all, PC1 < 0.2)
> plot <- ggplot(r_bin18_all, aes(x=isolation_bias, y=gran_ratio, fill=bin, size=Contig_length)) +
geom_point(alpha=0.5, shape=21)
> plot
> plot <- ggplot(r_bin18_all, aes(x=GC_content, y=Sequencing_depth, fill=bin, size=Contig_length)) +
geom_point(alpha=0.5, shape=21)
> plot
> r_bin18_all <- subset(r_bin18_all, Sequencing_depth > 8)
> plot <- ggplot(r_bin18_all, aes(x=GC_content, y=Sequencing_depth, fill=bin, size=Contig_length)) +
geom_point(alpha=0.5, shape=21)
> plot
> plot <- ggplot(r_bin18_all, aes(x=isolation_bias, y=gran_ratio, fill=bin, size=Contig_length)) +
geom_point(alpha=0.5, shape=21)
> plot
> temp <- temp[!(temp$Contig %in% r_bin18_all$Contig), ]
> plot <- ggplot(s_bin19, aes(x=GC_content, y=Sequencing_depth, fill=bin, size=Contig_length)) +
geom_point(alpha=0.5, shape=21)
> plot
> s_bin19_all <- s_bin19
> s_bin19_all <- subset(s_bin19_all, Sequencing_depth > 8)
> plot <- ggplot(s_bin19, aes(x=GC_content, y=Sequencing_depth, fill=bin, size=Contig_length)) +
geom_point(alpha=0.5, shape=21)
>
> plot
> plot <- ggplot(s_bin19_all, aes(x=GC_content, y=Sequencing_depth, fill=bin, size=Contig_length)) +
geom_point(alpha=0.5, shape=21)
> plot
> plot <- ggplot(s_bin19_all, aes(x=gran_ratio, y=isolation_bias, fill=bin, size=Contig_length)) +
geom_point(alpha=0.5, shape=21)
> plot
> s_bin19_all <- subset(s_bin19_all, GC_content > 0.36)
> temp <- temp[!(temp$Contig %in% s_bin19_all$Contig), ]
> plot <- ggplot(temp, aes(x=isolation_bias, y=Sequencing_depth, fill=bin, size=Contig_length)) +
geom_point(alpha=0.5, shape=21)
> plot
> plot + xlim(0,2)
Warning message:
Removed 154 rows containing missing values (geom_point).
> plot + xlim(0,2) + ylim(0,50)
Warning message:
Removed 391 rows containing missing values (geom_point).
> plot + xlim(0,1) + ylim(0,20)
Warning message:
Removed 3198 rows containing missing values (geom_point).

```

```

> t_bin20 <- subset(temp, isolation_bias > 0.25 & isolation_bias < 1 & Sequencing_depth > 5)
> plot <- ggplot(t_bin20, aes(x=isolation_bias, y=gran_ratio, fill=bin, size=Contig_length)) + geom_point(alpha=0.5,
shape=21)
> plot
> t_bin20 <- subset(t_bin20, gran_ratio < 2)
> plot <- ggplot(t_bin20, aes(x=isolation_bias, y=gran_ratio, fill=bin, size=Contig_length)) + geom_point(alpha=0.5,
shape=21)
> plot
> t_bin20 <- subset(t_bin20, gran_ratio < 1.5 & gran_ratio > 0.5)
> t_bin20 <- subset(t_bin20, isolation_bias < 0.8)
> t_bin20 <- subset(t_bin20, isolation_bias > 0.3)
> rda <- rda(t_bin20[,13:268], data=t_bin20[,1:12], scale=T)
> X_scores <- scores(rda, choices = 1:5)$sites
> t_bin20_all <- cbind(t_bin20, X_scores)
> pairs(t_bin20_all[,269:273], upper.panel=NULL)
> plot <- ggplot(t_bin20_all, aes(x=PC1, y=PC2, fill=bin, size=Contig_length)) + geom_point(alpha=0.5, shape=21)
> plot
> t_bin20_all <- subset(t_bin20_all, PC1 < 0)
> t_bin20_all <- subset(t_bin20_all, PC2 < 0.5)
> plot <- ggplot(t_bin20_all, aes(x=PC1, y=PC2, fill=bin, size=Contig_length)) + geom_point(alpha=0.5, shape=21)
> plot
> t_bin20_all <- subset(t_bin20_all, PC1 > -0.5)
> t_bin20_all <- subset(t_bin20_all, PC1 < -0.1)
> t_bin20 <- t_bin20_all[-c(269:273)]
> plot <- ggplot(t_bin20_all, aes(x=isolation_bias, y=gran_ratio, fill=bin, size=Contig_length)) +
geom_point(alpha=0.5, shape=21)
> plot
> t_bin20_all <- subset(t_bin20_all, gran_ratio < 1.25)
> t_bin20_all <- subset(t_bin20_all, gran_ratio > 0.65)
> t_bin20_all <- subset(t_bin20_all, isolation_bias < 0.75)
> t_bin20_all <- subset(t_bin20_all, isolation_bias > 0.35)
> plot <- ggplot(t_bin20_all, aes(x=isolation_bias, y=gran_ratio, fill=bin, size=Contig_length)) +
geom_point(alpha=0.5, shape=21)
> plot
> plot <- ggplot(t_bin20_all, aes(x=GC_content, y=Sequencing_depth, fill=bin, size=Contig_length)) +
geom_point(alpha=0.5, shape=21)
> plot
> plot + ylim(0,20)
Warning message:
Removed 69 rows containing missing values (geom_point).
> t_bin20_all <- subset(t_bin20_all, Sequencing_depth > 7)
> t_bin20 <- t_bin20_all[-c(269:273)]
> rda <- rda(t_bin20[,13:268], data=t_bin20[,1:12], scale=T)
> X_scores <- scores(rda, choices = 1:5)$sites
> t_bin20_all <- cbind(t_bin20, X_scores)
> pairs(t_bin20_all[,269:273], upper.panel=NULL)
> plot <- ggplot(t_bin20_all, aes(x=PC1, y=PC2, fill=bin, size=Contig_length)) + geom_point(alpha=0.5, shape=21)
> plot
> t_bin20_all <- subset(t_bin20_all, PC1 > -0.5)
> plot <- ggplot(t_bin20_all, aes(x=PC1, y=PC2, fill=bin, size=Contig_length)) + geom_point(alpha=0.5, shape=21)
> plot
> plot <- ggplot(t_bin20_all, aes(x=isolation_bias, y=gran_ratio, fill=bin, size=Contig_length)) +
geom_point(alpha=0.5, shape=21)
> plot

```

```

> t_bin20_all <- subset(t_bin20_all, gran_ratio > 0.7)
> t_bin20 <- t_bin20_all[-c(269:273)]
> rda <- rda(t_bin20[,13:268], data=t_bin20[,1:12], scale=T)
> X_scores <- scores(rda, choices = 1:5)$sites
> t_bin20_all <- cbind(t_bin20, X_scores)
> pairs(t_bin20_all[,269:273], upper.panel=NULL)
> plot <- ggplot(t_bin20_all, aes(x=PC1, y=PC2, fill=bin, size=Contig_length)) + geom_point(alpha=0.5, shape=21)
> plot
> plot <- ggplot(t_bin20_all, aes(x=PC1, y=PC3, fill=bin, size=Contig_length)) + geom_point(alpha=0.5, shape=21)
> plot
> t_bin20_all <- subset(t_bin20_all, PC1 < 1.1)
> plot <- ggplot(t_bin20_all, aes(x=PC1, y=PC3, fill=bin, size=Contig_length)) + geom_point(alpha=0.5, shape=21)
> plot
> t_bin20_all <- subset(t_bin20_all, PC3 > -2)
> t_bin20_all <- subset(t_bin20_all, PC3 < 2)
> plot <- ggplot(t_bin20_all, aes(x=isolation_bias, y=gran_ratio, fill=bin, size=Contig_length)) +
geom_point(alpha=0.5, shape=21)
> plot
> plot + ylim(0,100)
Warning message:
Removed 289 rows containing missing values (geom_point).
> temp <- temp[!(temp$Contig %in% t_bin20_all$Contig), ]
> plot <- ggplot(temp, aes(x=isolation_bias, y=Sequencing_depth, fill=bin, size=Contig_length)) +
geom_point(alpha=0.5, shape=21)
> plot
> plot + xlim(0,2) + ylim(0,100)
Warning message:
Removed 206 rows containing missing values (geom_point).
> plot + xlim(0,2) + ylim(0,10)
Warning message:
Removed 7165 rows containing missing values (geom_point).
> plot + xlim(0,0.5) + ylim(0,10)
Warning message:
Removed 15250 rows containing missing values (geom_point).
> plot + xlim(0,0.5) + ylim(0,50)
Warning message:
Removed 8730 rows containing missing values (geom_point).
> u_bin21 <- subset(temp, isolation_bias < 0.5 & Sequencing_depth > 5)
> u_bin21 <- subset(u_bin21, gran_ratio < 5)
> plot <- ggplot(u_bin21, aes(x=isolation_bias, y=gran_ratio, fill=bin, size=Contig_length)) + geom_point(alpha=0.5,
shape=21)
> plot
> u_bin21 <- subset(u_bin21, gran_ratio < 2)
> plot <- ggplot(u_bin21, aes(x=isolation_bias, y=gran_ratio, fill=bin, size=Contig_length)) + geom_point(alpha=0.5,
shape=21)
> plot
> u_bin21 <- subset(u_bin21, gran_ratio < 1.2)
> u_bin21 <- subset(u_bin21, isolation_bias > 0.01)
> plot <- ggplot(u_bin21, aes(x=isolation_bias, y=gran_ratio, fill=bin, size=Contig_length)) + geom_point(alpha=0.5,
shape=21)
> plot
> u_bin21 <- subset(u_bin21, gran_ratio > 0.3)
> rda <- rda(u_bin21[,13:268], data=u_bin21[,1:12], scale=T)
> X_scores <- scores(rda, choices = 1:5)$sites

```

```

> u_bin21_all <- cbind(u_bin21, X_scores)
> pairs(t_bin20_all[,269:273], upper.panel=NULL)
> pairs(u_bin21_all[,269:273], upper.panel=NULL)
> plot <- ggplot(u_bin21_all, aes(x=PC1, y=PC2, fill=bin, size=Contig_length)) + geom_point(alpha=0.5, shape=21)
> plot
> u_bin21_all <- subset(u_bin21_all, PC1 < 0.2)
> u_bin21_all <- subset(u_bin21_all, PC2 < 0)
> plot <- ggplot(u_bin21_all, aes(x=PC1, y=PC2, fill=bin, size=Contig_length)) + geom_point(alpha=0.5, shape=21)
> plot
> u_bin21_all <- subset(u_bin21_all, PC1 > -0.3)
> plot <- ggplot(u_bin21_all, aes(x=PC1, y=PC3, fill=bin, size=Contig_length)) + geom_point(alpha=0.5, shape=21)
> plot
> u_bin21_all <- subset(u_bin21_all, PC1 < 0.1)
> u_bin21 <- u_bin21_all[-c(269:273)]
> rda <- rda(u_bin21[,13:268], data=u_bin21[,1:12], scale=T)
> X_scores <- scores(rda, choices = 1:5)$sites
> u_bin21_all <- cbind(u_bin21, X_scores)
> pairs(u_bin21_all[,269:273], upper.panel=NULL)
> plot <- ggplot(u_bin21_all, aes(x=PC1, y=PC2, fill=bin, size=Contig_length)) + geom_point(alpha=0.5, shape=21)
> plot
> plot <- ggplot(u_bin21_all, aes(x=PC4, y=PC2, fill=bin, size=Contig_length)) + geom_point(alpha=0.5, shape=21)
> plot
> u_bin21_all <- subset(u_bin21_all, PC2 < 0)
> u_bin21_all <- subset(u_bin21_all, PC4 > -0.5)
> plot <- ggplot(u_bin21_all, aes(x=PC1, y=PC2, fill=bin, size=Contig_length)) + geom_point(alpha=0.5, shape=21)
> plot
> plot <- ggplot(u_bin21_all, aes(x=GC_content, y=Sequencing_depth, fill=bin, size=Contig_length)) +
geom_point(alpha=0.5, shape=21)
> plot
> plot + ylim(0,100)
Warning message:
Removed 5 rows containing missing values (geom_point).
> plot <- ggplot(u_bin21_all, aes(x=isolation_bias, y=gran_ratio, fill=bin, size=Contig_length)) +
geom_point(alpha=0.5, shape=21)
> plot
> u_bin21_all <- subset(u_bin21_all, gran_ratio < 1)
> u_bin21_all <- subset(u_bin21_all, isolation_bias < 0.35)
> u_bin21 <- u_bin21_all[-c(269:273)]
> rda <- rda(u_bin21[,13:268], data=u_bin21[,1:12], scale=T)
> X_scores <- scores(rda, choices = 1:5)$sites
> u_bin21_all <- cbind(u_bin21, X_scores)
> pairs(u_bin21_all[,269:273], upper.panel=NULL)
> plot <- ggplot(u_bin21_all, aes(x=PC1, y=PC2, fill=bin, size=Contig_length)) + geom_point(alpha=0.5, shape=21)
> plot
> u_bin21_all <- subset(u_bin21_all, PC1 < 0)
> plot <- ggplot(u_bin21_all, aes(x=PC1, y=PC3, fill=bin, size=Contig_length)) + geom_point(alpha=0.5, shape=21)
> plot
> plot <- ggplot(u_bin21_all, aes(x=PC2, y=PC3, fill=bin, size=Contig_length)) + geom_point(alpha=0.5, shape=21)
> plot
> plot <- ggplot(u_bin21_all, aes(x=isolation_bias, y=gran_ratio, fill=bin, size=Contig_length)) +
geom_point(alpha=0.5, shape=21)
> plot
> plot <- ggplot(u_bin21_all, aes(x=GC_content, y=Sequencing_depth, fill=bin, size=Contig_length)) +
geom_point(alpha=0.5, shape=21)

```

```

> plot
> u_bin21_all <- subset(u_bin21_all, Sequencing_depth > 10 | GC_content > 0.59)
> plot <- ggplot(u_bin21_all, aes(x=GC_content, y=Sequencing_depth, fill=bin, size=Contig_length)) +
geom_point(alpha=0.5, shape=21)
> plot
> u_bin21 <- u_bin21_all[-c(269:273)]
> rda <- rda(u_bin21[,13:268], data=u_bin21[,1:12], scale=T)
> X_scores <- scores(rda, choices = 1:5)$sites
> u_bin21_all <- cbind(u_bin21, X_scores)
> pairs(u_bin21_all[,269:273], upper.panel=NULL)
> plot <- ggplot(u_bin21_all, aes(x=PC1, y=PC2, fill=bin, size=Contig_length)) + geom_point(alpha=0.5, shape=21)
> plot
> plot <- ggplot(u_bin21_all, aes(x=PC1, y=GC_content, fill=bin, size=Contig_length)) + geom_point(alpha=0.5,
shape=21)
> plot
> plot <- ggplot(u_bin21_all, aes(x=PC2, y=isolation_bias, fill=bin, size=Contig_length)) + geom_point(alpha=0.5,
shape=21)
> plot
> plot <- ggplot(u_bin21_all, aes(x=gran_ratio, y=isolation_bias, fill=bin, size=Contig_length)) +
geom_point(alpha=0.5, shape=21)
> plot
> u_bin21_all <- subset(u_bin21_all, PC2 < 2)
> plot <- ggplot(u_bin21_all, aes(x=PC2, y=PC3, fill=bin, size=Contig_length)) + geom_point(alpha=0.5, shape=21)
> plot
> u_bin21_all <- subset(u_bin21_all, PC3 > -2)
> View(u_bin21_all)
> View(u_bin21_all)
> temp <- temp[!(temp$Contig %in% u_bin21_all$Contig), ]
> plot <- ggplot(temp, aes(x=gran_ratio, y=Sequencing_depth, fill=bin, size=Contig_length)) + geom_point(alpha=0.5,
shape=21)
> plot + ylim(0,50) + xlim(0,5)
Warning message:
Removed 1058 rows containing missing values (geom_point).
> plot + ylim(0,50) + xlim(0,1)
Warning message:
Removed 36992 rows containing missing values (geom_point).
> plot + ylim(0,20) + xlim(0,1)
Warning message:
Removed 37685 rows containing missing values (geom_point).
> v_bin22 <- subset(temp, gran_ratio > 0.4 & gran_ratio < 1 & Sequencing_depth > 5)
> plot <- ggplot(temp, aes(x=gran_ratio, y=isolation_bias, fill=bin, size=Contig_length)) + geom_point(alpha=0.5,
shape=21)
> plot
> plot <- ggplot(v_bin22, aes(x=gran_ratio, y=isolation_bias, fill=bin, size=Contig_length)) + geom_point(alpha=0.5,
shape=21)
> plot
> v_bin22 <- subset(v_bin22, isolation_bias < 1)
> plot <- ggplot(v_bin22, aes(x=gran_ratio, y=isolation_bias, fill=bin, size=Contig_length)) + geom_point(alpha=0.5,
shape=21)
> plot
> v_bin22 <- subset(v_bin22, isolation_bias < 0.5)
> plot <- ggplot(v_bin22, aes(x=gran_ratio, y=isolation_bias, fill=bin, size=Contig_length)) + geom_point(alpha=0.5,
shape=21)
> plot

```



```

> v_bin22 <- subset(v_bin22, isolation_bias > 0.1)
> v_bin22 <- subset(v_bin22, gran_ratio < 0.9)
> rda <- rda(v_bin22[,13:268], data=v_bin22[,1:12], scale=T)
> X_scores <- scores(rda, choices = 1:5)$sites
> v_bin22_all <- cbind(v_bin22, X_scores)
> pairs(v_bin22_all[,269:273], upper.panel=NULL)
> plot <- ggplot(v_bin22, aes(x=PC1, y=PC2, fill=bin, size=Contig_length)) + geom_point(alpha=0.5, shape=21)
> plot
Error in eval(expr, envir, enclos) : object 'PC1' not found

> plot <- ggplot(v_bin22_all, aes(x=PC1, y=PC2, fill=bin, size=Contig_length)) + geom_point(alpha=0.5, shape=21)
> plot
> v_bin22_all <- subset(v_bin22_all, PC1 > -0.2)
> plot <- ggplot(v_bin22_all, aes(x=PC1, y=PC2, fill=bin, size=Contig_length)) + geom_point(alpha=0.5, shape=21)
> plot
> v_bin22_all <- subset(v_bin22_all, PC1 < 0.5)
> plot <- ggplot(v_bin22_all, aes(x=PC3, y=PC2, fill=bin, size=Contig_length)) + geom_point(alpha=0.5, shape=21)
> plot
> plot <- ggplot(v_bin22_all, aes(x=PC3, y=PC1, fill=bin, size=Contig_length)) + geom_point(alpha=0.5, shape=21)
> plot
> v_bin22_all <- subset(v_bin22_all, PC1 < 0.3)
> v_bin22_all <- subset(v_bin22_all, PC1 > 0)
> v_bin22 <- v_bin22_all[-c(269:273)]
> rda <- rda(v_bin22[,13:268], data=v_bin22[,1:12], scale=T)
> X_scores <- scores(rda, choices = 1:5)$sites
> v_bin22_all <- cbind(v_bin22, X_scores)
> pairs(v_bin22_all[,269:273], upper.panel=NULL)
> plot <- ggplot(v_bin22_all, aes(x=PC1, y=PC2, fill=bin, size=Contig_length)) + geom_point(alpha=0.5, shape=21)
> plot
> v_bin22_all <- subset(v_bin22_all, PC1 > 0)
> plot <- ggplot(v_bin22_all, aes(x=PC1, y=PC2, fill=bin, size=Contig_length)) + geom_point(alpha=0.5, shape=21)
> plot
> v_bin22_all <- subset(v_bin22_all, PC1 > 0.2)
> plot <- ggplot(v_bin22_all, aes(x=PC1, y=PC2, fill=bin, size=Contig_length)) + geom_point(alpha=0.5, shape=21)
> plot
> v_bin22_all <- subset(v_bin22_all, PC1 > 0.3)
> plot <- ggplot(v_bin22_all, aes(x=gran_ratio, y=isolation_bias, fill=bin, size=Contig_length)) +
geom_point(alpha=0.5, shape=21)
> plot
> plot <- ggplot(v_bin22_all, aes(x=GC_content, y=Sequencing_depth, fill=bin, size=Contig_length)) +
geom_point(alpha=0.5, shape=21)
> plot
> v_bin22 <- v_bin22_all[-c(269:273)]
> rda <- rda(v_bin22[,13:268], data=v_bin22[,1:12], scale=T)
> X_scores <- scores(rda, choices = 1:5)$sites
> v_bin22_all <- cbind(v_bin22, X_scores)
> pairs(v_bin22_all[,269:273], upper.panel=NULL)
> plot <- ggplot(v_bin22_all, aes(x=PC1, y=PC2, fill=bin, size=Contig_length)) + geom_point(alpha=0.5, shape=21)
> plot
> v_bin22_all <- subset(v_bin22_all, PC1 > -2)
> v_bin22_all <- subset(v_bin22_all, PC2 < 2)
> v_bin22_all <- subset(v_bin22_all, PC1 < 2)
> v_bin22_all <- subset(v_bin22_all, PC2 > -2)
> v_bin22_all <- subset(v_bin22_all, PC1 > -1 | PC2 < 0)

```

```

> plot <- ggplot(v_bin22, aes(x=gran_ratio, y=isolation_bias, fill=bin, size=Contig_length)) + geom_point(alpha=0.5,
shape=21)
> plot
> plot <- ggplot(v_bin22, aes(x=GC_content, y=Sequencing_depth, fill=bin, size=Contig_length)) +
geom_point(alpha=0.5, shape=21)
> plot
> temp <- temp[!(temp$Contig %in% v_bin22_all$Contig), ]
> plot <- ggplot(temp, aes(x=gran_ratio, y=Sequencing_depth, fill=bin, size=Contig_length)) + geom_point(alpha=0.5,
shape=21)
> plot
> plot + xlim(0,5)
Warning message:
Removed 822 rows containing missing values (geom_point).
> plot + xlim(0,5) + ylim(0,40)
Warning message:
Removed 1182 rows containing missing values (geom_point).
> plot + xlim(0,1) + ylim(0,20)
Warning message:
Removed 37683 rows containing missing values (geom_point).
> w_bin23 <- subset(temp, gran_ratio > 0.1 & gran_ratio < 1 & Sequencing_depth > 5)
> plot <- ggplot(w_bin23, aes(x=gran_ratio, y=isolation_bias, fill=bin, size=Contig_length)) + geom_point(alpha=0.5,
shape=21)
> plot
> w_bin23 <- subset(w_bin23, isolation_bias < 1)
> plot <- ggplot(w_bin23, aes(x=gran_ratio, y=isolation_bias, fill=bin, size=Contig_length)) + geom_point(alpha=0.5,
shape=21)
> plot
> w_bin23 <- subset(w_bin23, isolation_bias < 0.5)
> plot <- ggplot(w_bin23, aes(x=gran_ratio, y=isolation_bias, fill=bin, size=Contig_length)) + geom_point(alpha=0.5,
shape=21)
> plot
> w_bin23 <- subset(w_bin23, isolation_bias > 0.01)
> w_bin23 <- subset(w_bin23, gran_ratio < 0.8)
> w_bin23 <- subset(w_bin23, gran_ratio > 0.2)
> plot <- ggplot(w_bin23, aes(x=gran_ratio, y=isolation_bias, fill=bin, size=Contig_length)) + geom_point(alpha=0.5,
shape=21)
> plot
> w_bin23 <- subset(w_bin23, isolation_bias < 0.4)
> w_bin23 <- subset(w_bin23, gran_ratio < 0.7)
> rda <- rda(w_bin23[,13:268], data=w_bin23[,1:12], scale=T)
> X_scores <- scores(rda, choices = 1:5)$sites
> w_bin23_all <- cbind(w_bin23,X_scores)
> pairs(w_bin23_all[,269:273], upper.panel=NULL)
> plot <- ggplot(w_bin23_all, aes(x=PC1, y=PC2, fill=bin, size=Contig_length)) + geom_point(alpha=0.5, shape=21)
> plot
> w_bin23_all <- subset(w_bin23_all, PC1 > 0)
> w_bin23_all <- subset(w_bin23_all, PC2 < 1)
> plot <- ggplot(w_bin23_all, aes(x=PC1, y=PC3, fill=bin, size=Contig_length)) + geom_point(alpha=0.5, shape=21)
> plot
> w_bin23_all <- subset(w_bin23_all, PC3 < 0)
> plot <- ggplot(w_bin23_all, aes(x=PC1, y=PC3, fill=bin, size=Contig_length)) + geom_point(alpha=0.5, shape=21)
> plot
> w_bin23_all <- subset(w_bin23_all, PC3 < 0.2)
> w_bin23_all <- subset(w_bin23_all, PC1 < 0.5)

```



```

> w_bin23_all <- subset(w_bin23_all, PC3 < -0.2)
> plot <- ggplot(w_bin23_all, aes(x=gran_ratio, y=isolation_bias, fill=bin, size=Contig_length)) +
geom_point(alpha=0.5, shape=21)
> plot
> w_bin23_all <- subset(w_bin23_all, gran_ratio > 0.3)
> w_bin23_all <- subset(w_bin23_all, isolation_bias < 0.3)
> plot <- ggplot(w_bin23_all, aes(x=GC_content, y=Sequencing_depth, fill=bin, size=Contig_length)) +
geom_point(alpha=0.5, shape=21)
> plot
> w_bin23 <- w_bin23_all[-c(269:2783)]
> w_bin23 <- w_bin23_all[-c(269:273)]
> rda <- rda(w_bin23[,13:268], data=w_bin23[,1:12], scale=T)
> X_scores <- scores(rda, choices = 1:5)$sites
> w_bin23_all <- cbind(w_bin23,X_scores)
> pairs(w_bin23_all[,269:273], upper.panel=NULL)
> plot <- ggplot(w_bin23_all, aes(x=PC1, y=PC2, fill=bin, size=Contig_length)) + geom_point(alpha=0.5, shape=21)
> plot
> w_bin23_all <- subset(w_bin23_all, PC2 > -1)
> w_bin23_all <- subset(w_bin23_all, PC1 < 0.1)
> plot <- ggplot(w_bin23_all, aes(x=PC1, y=PC2, fill=bin, size=Contig_length)) + geom_point(alpha=0.5, shape=21)
> plot
> w_bin23_all <- subset(w_bin23_all, PC1 > -1.5)
> plot <- ggplot(w_bin23_all, aes(x=GC_content, y=Sequencing_depth, fill=bin, size=Contig_length)) +
geom_point(alpha=0.5, shape=21)
> plot
> plot <- ggplot(w_bin23_all, aes(x=gran_ratio, y=isolation_bias, fill=bin, size=Contig_length)) +
geom_point(alpha=0.5, shape=21)
> plot
> w_bin23 <- w_bin23_all[-c(269:273)]
> rda <- rda(w_bin23[,13:268], data=w_bin23[,1:12], scale=T)
> X_scores <- scores(rda, choices = 1:5)$sites
> w_bin23_all <- cbind(w_bin23,X_scores)
> pairs(w_bin23_all[,269:273], upper.panel=NULL)
> plot <- ggplot(w_bin23_all, aes(x=PC1, y=PC2, fill=bin, size=Contig_length)) + geom_point(alpha=0.5, shape=21)
> plot
> w_bin23_all <- subset(w_bin23_all, PC1 < 1.5)
> w_bin23_all <- subset(w_bin23_all, PC2 < 1.9)
> plot <- ggplot(w_bin23_all, aes(x=GC_content, y=Sequencing_depth, fill=bin, size=Contig_length)) +
geom_point(alpha=0.5, shape=21)
> plot
> temp <- temp[!(temp$Contig %in% w_bin23_all$Contig), ]
> plot <- ggplot(temp, aes(x=GC_content, y=Sequencing_depth, fill=bin, size=Contig_length)) +
geom_point(alpha=0.5, shape=21)
> plot
> plot + ylim(0,50)
Warning message:
Removed 235 rows containing missing values (geom_point).
> plot + ylim(0,20)
Warning message:
Removed 1412 rows containing missing values (geom_point).
> plot <- ggplot(w_bin23_all, aes(x=gran_ratio, y=Sequencing_depth, fill=bin, size=Contig_length)) +
geom_point(alpha=0.5, shape=21)
> plot <- ggplot(temp, aes(x=gran_ratio, y=Sequencing_depth, fill=bin, size=Contig_length)) + geom_point(alpha=0.5,
shape=21)

```

```

> plot
> plot + xlim(0,3)
Warning message:
Removed 2917 rows containing missing values (geom_point).
> plot + xlim(0,3) + ylim(0,30)
Warning message:
Removed 3563 rows containing missing values (geom_point).
> plot + xlim(1,2) + ylim(0,30)
Warning message:
Removed 60332 rows containing missing values (geom_point).
> x_bin24 <- subset(temp, gran_ratio > 1 & gran_ratio < 3)
> plot <- ggplot(x_bin24, aes(x=gran_ratio, y=isolation_bias, fill=bin, size=Contig_length)) + geom_point(alpha=0.5,
shape=21)
> plot
> x_bin24 <- subset(x_bin24, isolation_bias < 1)
> plot <- ggplot(x_bin24, aes(x=gran_ratio, y=isolation_bias, fill=bin, size=Contig_length)) + geom_point(alpha=0.5,
shape=21)
> plot
> x_bin24 <- subset(x_bin24, isolation_bias < 0.5)
> x_bin24 <- subset(x_bin24, isolation_bias > 0.01)
> plot <- ggplot(x_bin24, aes(x=gran_ratio, y=isolation_bias, fill=bin, size=Contig_length)) + geom_point(alpha=0.5,
shape=21)
> plot
> x_bin24 <- subset(x_bin24, isolation_bias < 0.4)
> plot <- ggplot(x_bin24, aes(x=isolation_bias, y=Sequencing_depth, fill=bin, size=Contig_length)) +
geom_point(alpha=0.5, shape=21)
> plot
> plot + ylim(0,20)
Warning message:
Removed 566 rows containing missing values (geom_point).
> x_bin24 <- subset(x_bin24, Sequencing_depth > 4)
> plot <- ggplot(x_bin24, aes(x=gran_ratio, y=isolation_bias, fill=bin, size=Contig_length)) + geom_point(alpha=0.5,
shape=21)
>
> plot
> plot <- ggplot(x_bin24, aes(x=gran_ratio, y=Sequencing_depth, fill=bin, size=Contig_length)) +
geom_point(alpha=0.5, shape=21)
> plot
> plot + ylim(0,20)
Warning message:
Removed 566 rows containing missing values (geom_point).
> x_bin24 <- subset(x_bin24, Sequencing_depth > 6)
> rda <- rda(x_bin24[,13:268], data=x_bin24[,1:12], scale=T)
> X_scores <- scores(rda, choices = 1:5)$sites
> x_bin24
> x_bin24_all <- cbind(x_bin24, X_scores)
> pairs(x_bin24_all[,269:273], upper.panel=NULL)
> plot <- ggplot(x_bin24_all, aes(x=PC1, y=PC2, fill=bin, size=Contig_length)) + geom_point(alpha=0.5, shape=21)
> plot
> plot <- ggplot(x_bin24_all, aes(x=PC1, y=Sequencing_depth, fill=bin, size=Contig_length)) +
geom_point(alpha=0.5, shape=21)
> plot
> plot + ylim(0,40)
Warning message:

```

```

Removed 147 rows containing missing values (geom_point).
> x_bin24_all <- subset(x_bin24_all, PC1 < 0.2)
> plot <- ggplot(x_bin24_all, aes(x=PC1, y=PC2, fill=bin, size=Contig_length)) + geom_point(alpha=0.5, shape=21)
> plot
> x_bin24_all <- subset(x_bin24_all, PC2 > -0.5)
> x_bin24_all <- subset(x_bin24_all, PC1 > -0.5)
> plot <- ggplot(x_bin24_all, aes(x=PC1, y=Sequencing_depth, fill=bin, size=Contig_length)) +
geom_point(alpha=0.5, shape=21)
> plot
> plot + ylim(0,40)
Warning message:
Removed 62 rows containing missing values (geom_point).
> plot + ylim(0,20)
Warning message:
Removed 259 rows containing missing values (geom_point).
> x_bin24_all <- subset(x_bin24_all, Sequencing_depth > 8)
> x_bin24 <- x_bin24_all[-c(269:273)]
> rda <- rda(x_bin24[,13:268], data=x_bin24[,1:12], scale=T)
> X_scores <- scores(rda, choices = 1:5)$sites
> x_bin24_all <- cbind(x_bin24, X_scores)
> pairs(x_bin24_all[,269:273], upper.panel=NULL)
> plot <- ggplot(x_bin24_all, aes(x=PC1, y=PC2, fill=bin, size=Contig_length)) + geom_point(alpha=0.5, shape=21)
> plot
> x_bin24_all <- subset(x_bin24_all, PC2 < -0.4)
> x_bin24_all <- subset(x_bin24_all, PC1 < 0.5)
> plot <- ggplot(x_bin24_all, aes(x=gran_ratio, y=isolation_bias, fill=bin, size=Contig_length)) +
geom_point(alpha=0.5, shape=21)
> plot
> x_bin24_all <- subset(x_bin24_all, isolation_bias < 0.2)
> plot <- ggplot(x_bin24_all, aes(x=GC_content, y=Sequencing_depth, fill=bin, size=Contig_length)) +
geom_point(alpha=0.5, shape=21)
> plot
> x_bin24 <- x_bin24_all[-c(269:273)]
> rda <- rda(x_bin24[,13:268], data=x_bin24[,1:12], scale=T)
> X_scores <- scores(rda, choices = 1:5)$sites
> x_bin24_all <- cbind(x_bin24, X_scores)
> pairs(x_bin24_all[,269:273], upper.panel=NULL)
> plot <- ggplot(x_bin24_all, aes(x=PC1, y=PC2, fill=bin, size=Contig_length)) + geom_point(alpha=0.5, shape=21)
> plot
> plot <- ggplot(x_bin24_all, aes(x=PC3, y=PC2, fill=bin, size=Contig_length)) + geom_point(alpha=0.5, shape=21)
> plot
> x_bin24_all <- subset(x_bin24_all, PC2 < 1)
> x_bin24_all <- subset(x_bin24_all, PC3 > -5)
> plot <- ggplot(x_bin24_all, aes(x=PC3, y=PC2, fill=bin, size=Contig_length)) + geom_point(alpha=0.5, shape=21)
> plot
> x_bin24_all <- subset(x_bin24_all, PC3 < 1.8)
> x_bin24_all <- subset(x_bin24_all, PC2 < 0.7)
> x_bin24_all <- subset(x_bin24_all, PC3 > -1.8)
> plot <- ggplot(x_bin24_all, aes(x=PC3, y=PC2, fill=bin, size=Contig_length)) + geom_point(alpha=0.5, shape=21)
> plot
> plot <- ggplot(x_bin24_all, aes(x=GC_content, y=Sequencing_depth, fill=bin, size=Contig_length)) +
geom_point(alpha=0.5, shape=21)
> plot
> plot <- ggplot(x_bin24_all, aes(x=gran_ratio, y=isolation_bias, fill=bin, size=Contig_length)) +

```

```

geom_point(alpha=0.5, shape=21)
> plot
> plot <- ggplot(x_bin24_all, aes(x=GC_content, y=isolation_bias, fill=bin, size=Contig_length)) +
geom_point(alpha=0.5, shape=21)
> plot
> x_bin24_all <- subset(x_bin24_all, gran_ratio < 2.3)
> plot <- ggplot(x_bin24_all, aes(x=GC_content, y=isolation_bias, fill=bin, size=Contig_length)) +
geom_point(alpha=0.5, shape=21)
> plot
> temp <- temp[!(temp$Contig %in% x_bin24_all$Contig), ]
> y_bin25 <- subset(temp, gran_ratio > 1 & gran_ratio < 3)
> y_bin25 <- subset(y_bin25, Sequencing_depth > 4)
> y_bin25 <- subset(y_bin25, Sequencing_depth > 6)
> rda <- rda(y_bin25[,13:268], data=y_bin25[,1:12], scale=T)
> X_scores <- scores(rda, choices = 1:5)$sites
> y_bin25_all <- cbind(y_bin25, X_scores)
> pairs(y_bin25_all[,269:273], upper.panel=NULL)
> plot <- ggplot(y_bin25_all, aes(x=PC1, y=PC2, fill=bin, size=Contig_length)) + geom_point(alpha=0.5, shape=21)
> plot
> plot <- ggplot(y_bin25_all, aes(x=PC1, y=Sequencing_depth, fill=bin, size=Contig_length)) +
geom_point(alpha=0.5, shape=21)
> plot
> plot + ylim(0,20)
Warning message:
Removed 598 rows containing missing values (geom_point).
> y_bin25_all <- subset(y_bin25_all, PC1 > 0.4)
> plot <- ggplot(y_bin25_all, aes(x=gran_ratio, y=isolation_bias, fill=bin, size=Contig_length)) +
geom_point(alpha=0.5, shape=21)
> plot
> y_bin25_all <- subset(y_bin25_all, isolation_bias < 0.5)
> plot <- ggplot(y_bin25_all, aes(x=gran_ratio, y=isolation_bias, fill=bin, size=Contig_length)) +
geom_point(alpha=0.5, shape=21)
> plot
> y_bin25_all <- subset(y_bin25_all, isolation_bias < 0.3)
> y_bin25_all <- subset(y_bin25_all, gran_ratio < 2.5)
> y_bin25 <- y_bin25_all[-c(269:273)]
> rda <- rda(y_bin25[,13:268], data=y_bin25[,1:12], scale=T)
> X_scores <- scores(rda, choices = 1:5)$sites
> y_bin25_all <- cbind(y_bin25, X_scores)
> pairs(y_bin25_all[,269:273], upper.panel=NULL)
> plot <- ggplot(y_bin25_all, aes(x=PC1, y=PC2, fill=bin, size=Contig_length)) + geom_point(alpha=0.5, shape=21)
> plot
> y_bin25_all <- subset(y_bin25_all, PC2 > -0.5)
> y_bin25_all <- subset(y_bin25_all, PC1 < 0.5)
> plot <- ggplot(y_bin25_all, aes(x=gran_ratio, y=isolation_bias, fill=bin, size=Contig_length)) +
geom_point(alpha=0.5, shape=21)
> plot
> plot <- ggplot(y_bin25_all, aes(x=GC_content, y=Sequencing_depth, fill=bin, size=Contig_length)) +
geom_point(alpha=0.5, shape=21)
> plot
> plot +ylim(0,20)
Warning message:
Removed 49 rows containing missing values (geom_point).
> y_bin25 <- y_bin25_all[-c(269:273)]

```

```

> rda <- rda(y_bin25[,13:268], data=y_bin25[,1:12], scale=T)
> X_scores <- scores(rda, choices = 1:5)$sites
> y_bin25_all <- cbind(y_bin25, X_scores)
> pairs(y_bin25_all[,269:273], upper.panel=NULL)
> plot <- ggplot(y_bin25_all, aes(x=PC1, y=PC2, fill=bin, size=Contig_length)) + geom_point(alpha=0.5, shape=21)
> plot
> plot <- ggplot(y_bin25_all, aes(x=PC3, y=PC2, fill=bin, size=Contig_length)) + geom_point(alpha=0.5, shape=21)
> plot
> y_bin25_all <- subset(y_bin25_all, PC3 > -0.5)
> y_bin25_all <- subset(y_bin25_all, PC2 > -0.5)
> plot <- ggplot(y_bin25_all, aes(x=PC3, y=PC2, fill=bin, size=Contig_length)) + geom_point(alpha=0.5, shape=21)
> plot
> plot <- ggplot(y_bin25_all, aes(x=PC2, y=Sequencing_depth, fill=bin, size=Contig_length)) +
geom_point(alpha=0.5, shape=21)
> plot
> plot + ylim(0,20)
Warning message:
Removed 30 rows containing missing values (geom_point).
> plot <- ggplot(y_bin25_all, aes(x=PC3, y=Sequencing_depth, fill=bin, size=Contig_length)) +
geom_point(alpha=0.5, shape=21)
> plot + ylim(0,20)
Warning message:
Removed 30 rows containing missing values (geom_point).
> y_bin25_all <- subset(y_bin25_all, PC3 > 0 | Sequencing_depth > 10)
> plot <- ggplot(y_bin25_all, aes(x=PC3, y=PC2, fill=bin, size=Contig_length)) + geom_point(alpha=0.5, shape=21)
> plot
> plot <- ggplot(y_bin25_all, aes(x=GC_content, y=Sequencing_depth, fill=bin, size=Contig_length)) +
geom_point(alpha=0.5, shape=21)
> plot
> plot <- ggplot(y_bin25_all, aes(x=PC1, y=PC2, fill=bin, size=Contig_length)) + geom_point(alpha=0.5, shape=21)
> plot
> y_bin25_all <- subset(y_bin25_all, PC2 > 0)
> plot <- ggplot(y_bin25_all, aes(x=PC1, y=PC2, fill=bin, size=Contig_length)) + geom_point(alpha=0.5, shape=21)
> plot
> plot <- ggplot(y_bin25_all, aes(x=GC_content, y=Sequencing_depth, fill=bin, size=Contig_length)) +
geom_point(alpha=0.5, shape=21)
> plot
> y_bin25 <- y_bin25_all[-c(269:273)]
> rda <- rda(y_bin25[,13:268], data=y_bin25[,1:12], scale=T)
> X_scores <- scores(rda, choices = 1:5)$sites
> y_bin25_all <- cbind(y_bin25, X_scores)
> pairs(y_bin25_all[,269:273], upper.panel=NULL)
> plot <- ggplot(y_bin25_all, aes(x=PC1, y=PC2, fill=bin, size=Contig_length)) + geom_point(alpha=0.5, shape=21)
> plot
> plot <- ggplot(y_bin25_all, aes(x=PC2, y=isolation_bias, fill=bin, size=Contig_length)) + geom_point(alpha=0.5,
shape=21)
> plot
> plot <- ggplot(y_bin25_all, aes(x=PC1, y=isolation_bias, fill=bin, size=Contig_length)) + geom_point(alpha=0.5,
shape=21)
> plot
> y_bin25_all <- subset(y_bin25_all, PC1 < 2)
> plot <- ggplot(y_bin25_all, aes(x=PC2, y=gran_ratio, fill=bin, size=Contig_length)) + geom_point(alpha=0.5,
shape=21)
> plot

```

```

> y_bin25_all <- subset(y_bin25_all, PC2 < 1.5)
> plot <- ggplot(y_bin25_all, aes(x=GC_content, y=Sequencing_depth, fill=bin, size=Contig_length)) +
geom_point(alpha=0.5, shape=21)
> plot
> plot <- ggplot(y_bin25_all, aes(x=PC1, y=PC2, fill=bin, size=Contig_length)) + geom_point(alpha=0.5, shape=21)
> plot
> plot <- ggplot(y_bin25_all, aes(x=isolation_bias, y=gran_ratio, fill=bin, size=Contig_length)) +
geom_point(alpha=0.5, shape=21)
> plot
> y_bin25_all <- subset(y_bin25_all, isolation_bias < 0.25)
> plot <- ggplot(y_bin25_all, aes(x=GC_content, y=Sequencing_depth, fill=bin, size=Contig_length)) +
geom_point(alpha=0.5, shape=21)
> plot
> plot <- ggplot(y_bin25_all, aes(x=isolation_bias, y=gran_ratio, fill=bin, size=Contig_length)) +
geom_point(alpha=0.5, shape=21)
> plot
> temp <- temp[!(temp$Contig %in% y_bin25_all$Contig), ]
> plot <- ggplot(temp, aes(x=isolation_bias, y=Sequencing_depth, fill=bin, size=Contig_length)) +
geom_point(alpha=0.5, shape=21)
> plot
> plot + xlim(0,2) + ylim(0,50)
Warning message:
Removed 388 rows containing missing values (geom_point).
> plot + xlim(0,2) + ylim(0,20)
Warning message:
Removed 1554 rows containing missing values (geom_point).
> plot + xlim(0.5,2) + ylim(0,20)
Warning message:
Removed 79565 rows containing missing values (geom_point).
> plot <- ggplot(temp, aes(x=gran_ratio, y=Sequencing_depth, fill=bin, size=Contig_length)) + geom_point(alpha=0.5,
shape=21)
> plot
> plot + xlim(0,5)
Warning message:
Removed 822 rows containing missing values (geom_point).
> plot + xlim(0,2) + ylim(0,40)
Error: unexpected ',' in "plot + xlim(0,2) + ylim(0),"
> plot + xlim(0,2) + ylim(0,40)
Warning message:
Removed 8971 rows containing missing values (geom_point).
> plot + xlim(0,3) + ylim(0,40)
Warning message:
Removed 3260 rows containing missing values (geom_point).
> plot + xlim(0,1) + ylim(0,20)
Warning message:
Removed 36900 rows containing missing values (geom_point).
> X_rest <- subset(temp, Sequencing_depth > 10)
> plot <- ggplot(X_rest, aes(x=isolation_bias, y=gran_ratio, fill=bin, size=Contig_length)) + geom_point(alpha=0.5,
shape=21)
> plot
> plot <- ggplot(X_rest, aes(x=Average_coverage_ctab, y=Average_coverage_kit, fill=bin, size=Contig_length)) +
geom_point(alpha=0.5, shape=21)
> plot
> plot <- ggplot(X_rest, aes(x=Average_coverage_gran, y=Average_coverage_total, fill=bin, size=Contig_length)) +

```

```
geom_point(alpha=0.5, shape=21)
> plot
> plot + xlim(0,100) + ylim(0,100)
Warning message:
Removed 28 rows containing missing values (geom_point).
> plot
> plot + xlim(0,50) + ylim(0,50)
Warning message:
Removed 82 rows containing missing values (geom_point).
> rda <- rda(X_rest[,13:268], data=X_rest[,1:12], scale=T)
> X_scores <- scores(rda, choices = 1:5)$sites
> X_rest_all <- cbind(X_rest,X_scores)
> pairs(X_rest_all[269:273], upper.panel=NULL)
> plot <- ggplot(X_rest_all, aes(x=PC1, y=PC2, fill=bin, size=Contig_length)) + geom_point(alpha=0.5, shape=21)
> plot
```
